# Supplementary material for: Identification and Validation of the miR156 Family Involved in Drought Responses and Tolerance in Tea Plants (Camellia sinensis (L.) O. Kuntze)
Source: MDPI journal article supplement (doi:10.3390/plants13020201), 2024-01-11
Supplement: s1 [file s1]

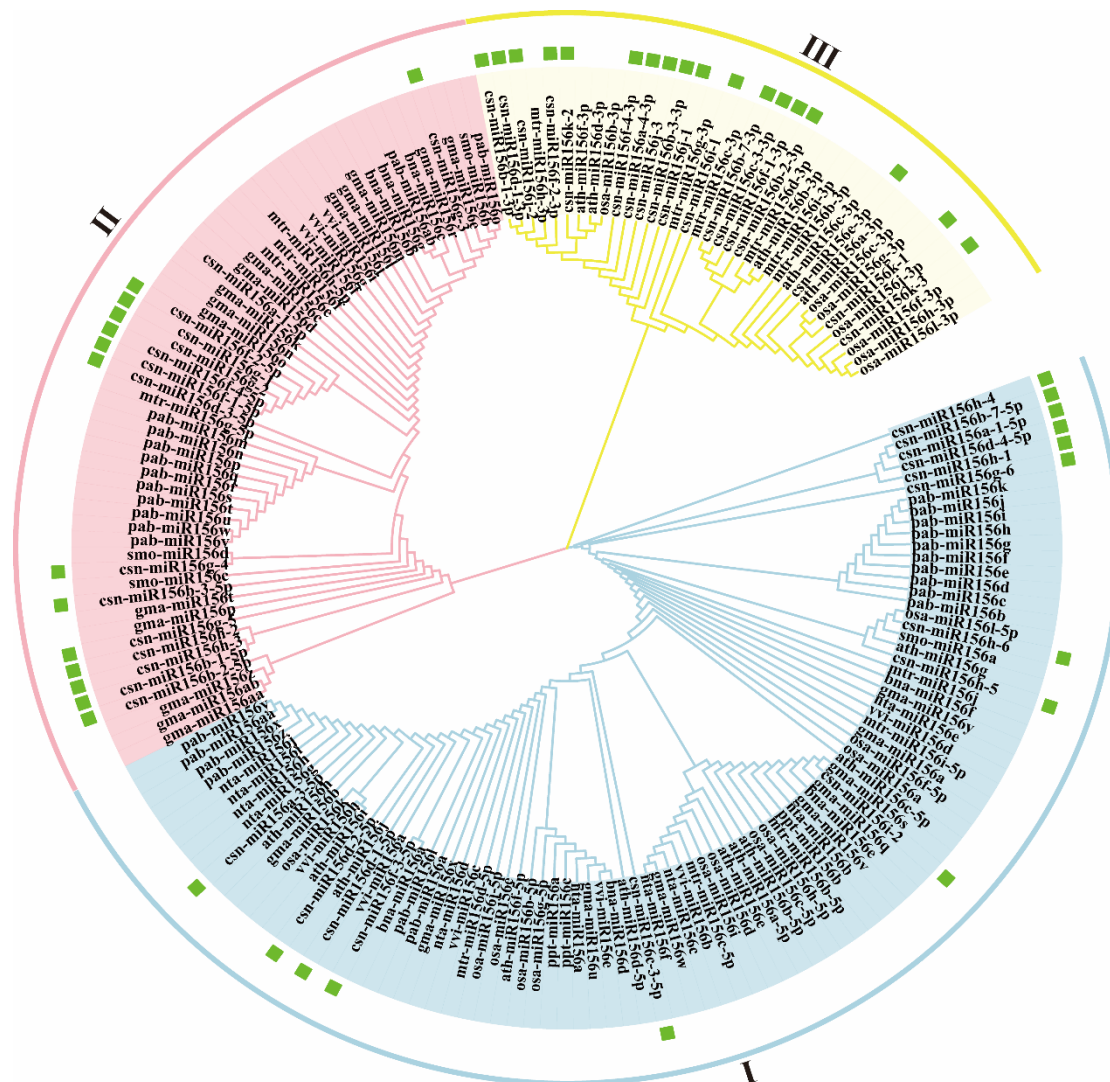

**Figure S1.** Phylogenetic tree of plants miR156 sequences. vvi. *Vitis vinifera*; smo. *Selaginella moellendorffii*; osa. *Oryza sativa*; csn. *Camellia sinensis*; ath. *Arabidopsis thaliana*; gma. *Glycine max*; mtr. *Medicago truncatula*; nta. *Nicotiana tabacum*; bna. *Brassica napus*; pab. *Picea abies*; ppt. *Physcomitrella patens*.

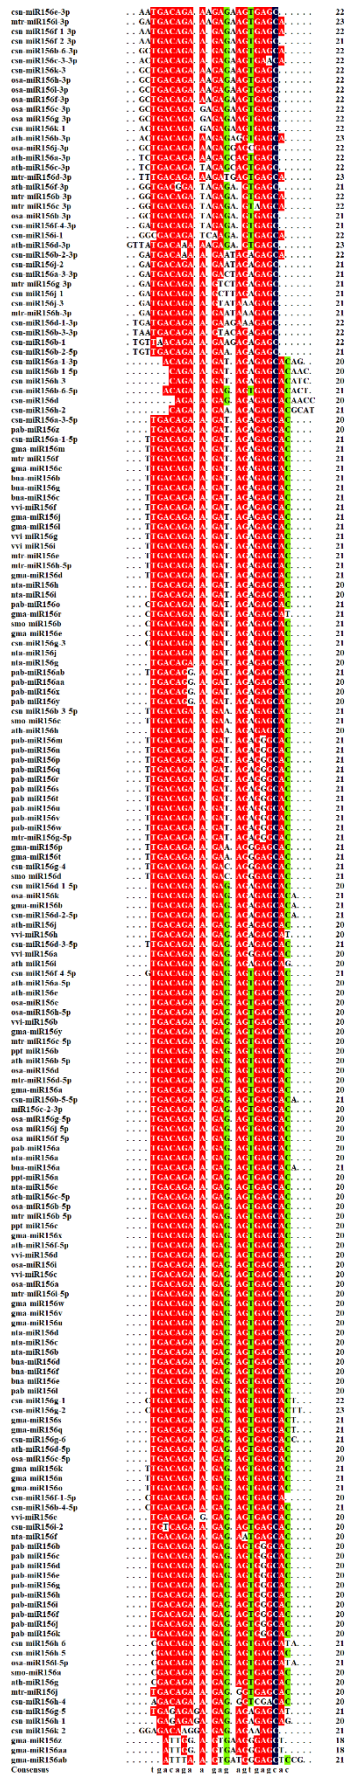

**Figure S2.** Sequence alignment analysis of miR156s. Different highlight colors represent different homology levels of sequence. Black.  $\geq 100\%$ ; Red.  $\geq 75\%$ ; Green.  $\geq 50\%$ .

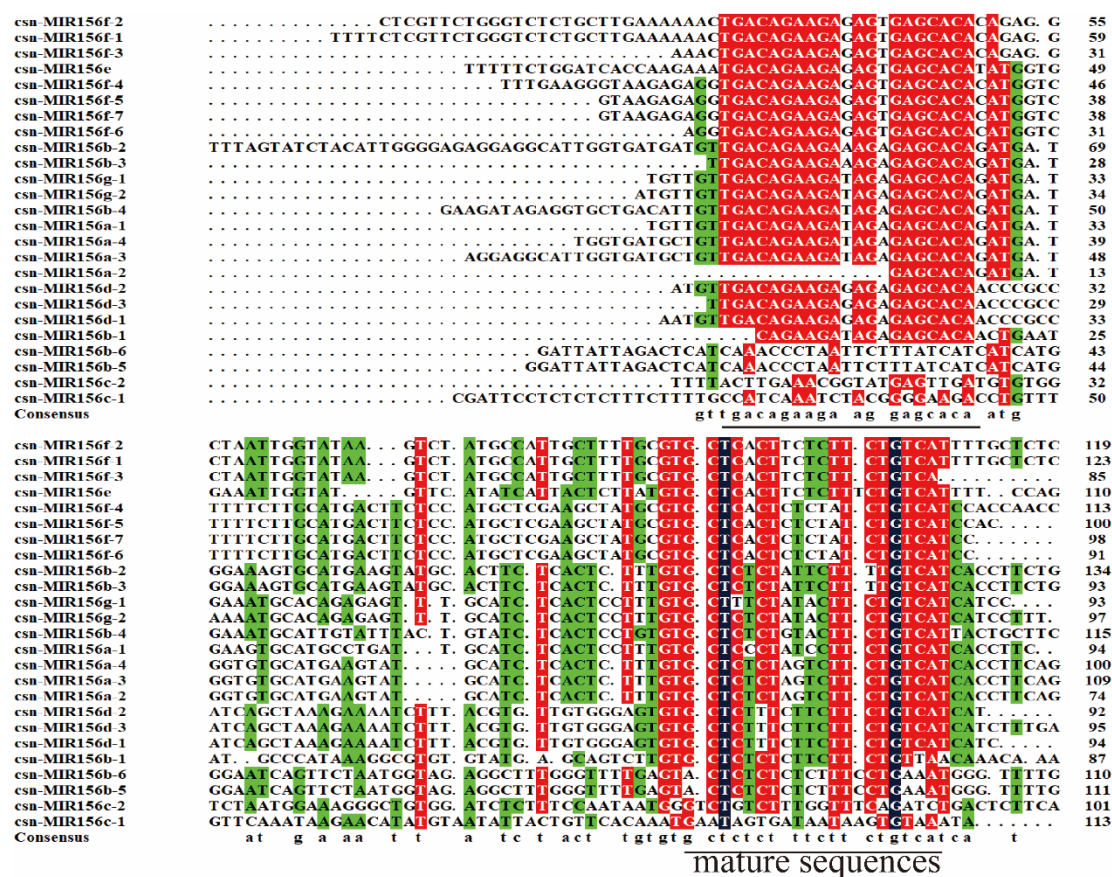

**Figure S3.** Sequences alignment among *C. sinensis* pre-miR156s. Different highlight colors represent different homology levels of sequence. Black, ≥100%; Red, ≥75%; Green, ≥50%.

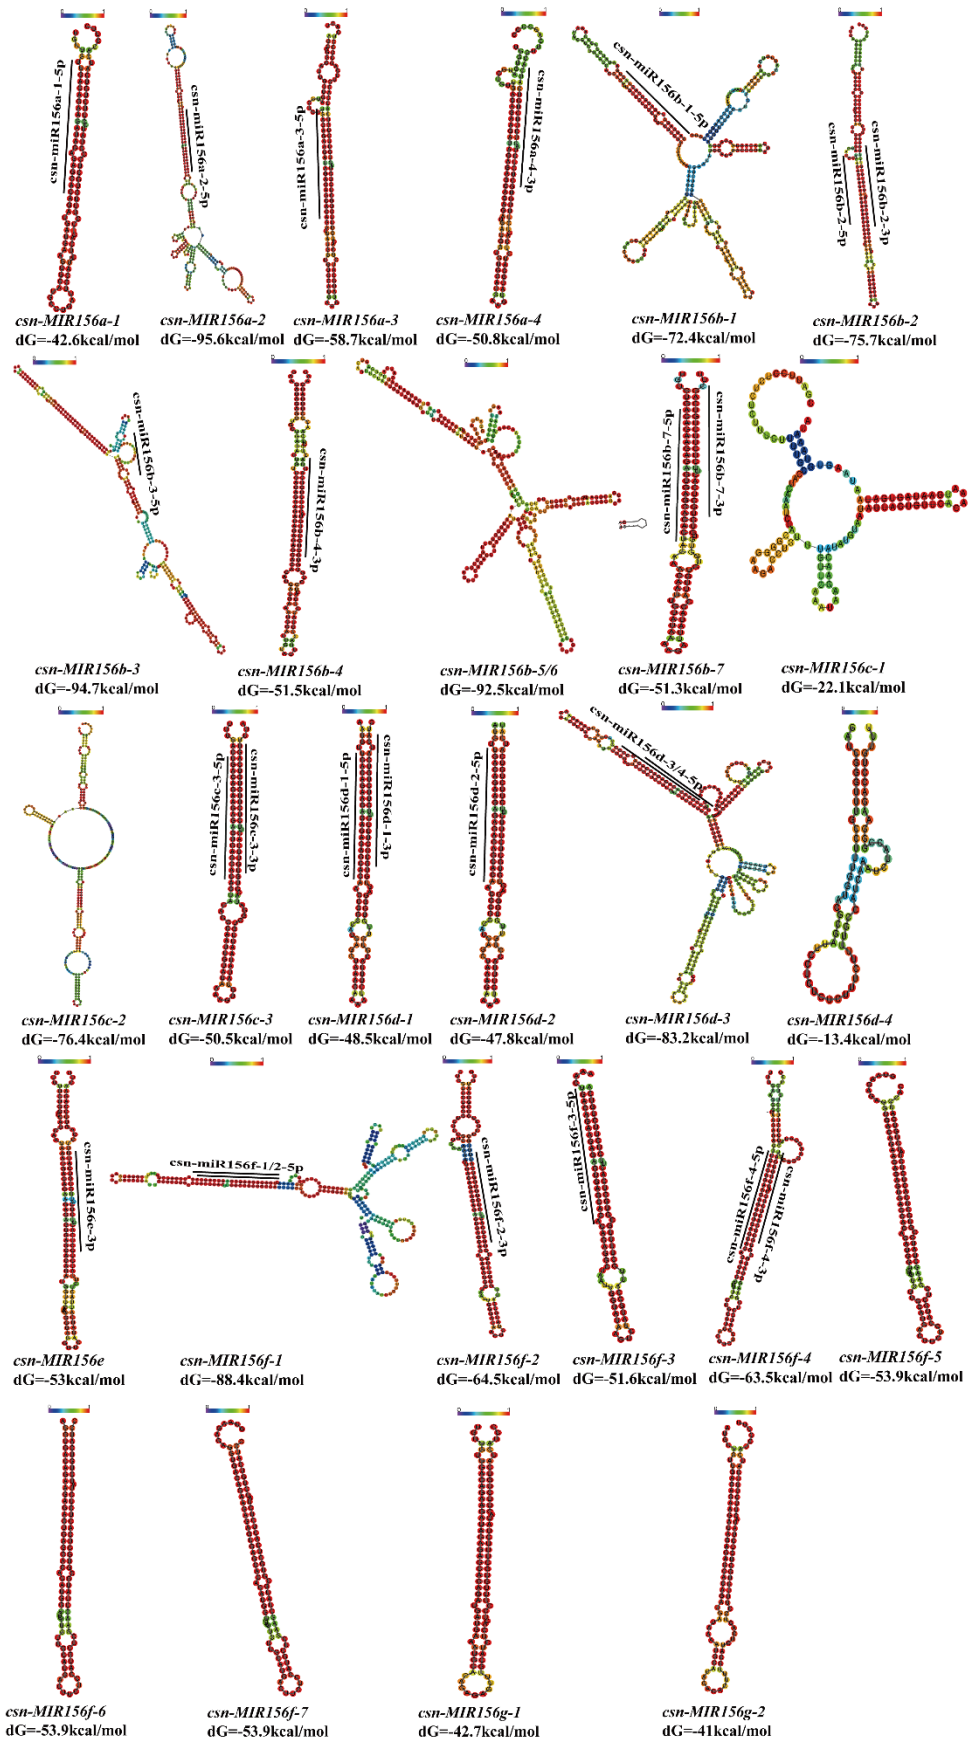

**Figure S4.** Stem-loop structures of csn-MIR156s in *C. sinensis*. The mature miRNA sequences are marked with a black line.

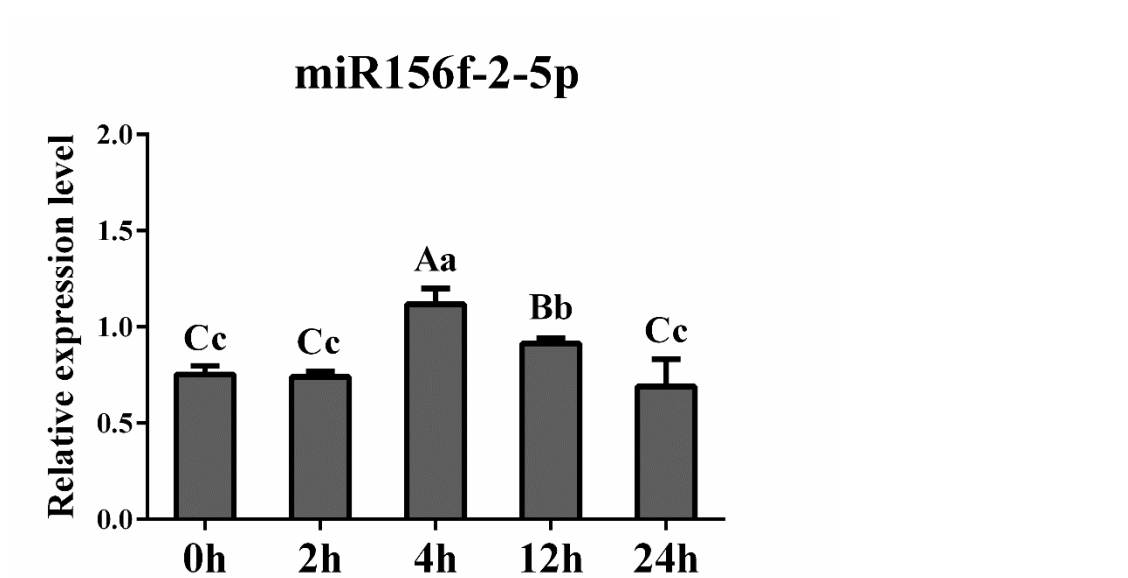

**Figure S5.** Expression patterns of the *csn-miR156f-2-5p* at 0 h, 2 h, 4 h, 12 h, and 24 h after 15% PEG treatment. Data were the mean of three independent replicates  $\pm$  standard deviation (SD). Different lowercase letters indicate significant differences ( $p < 0.05$ ); different uppercase letters indicate highly significant differences ( $p < 0.01$ ).

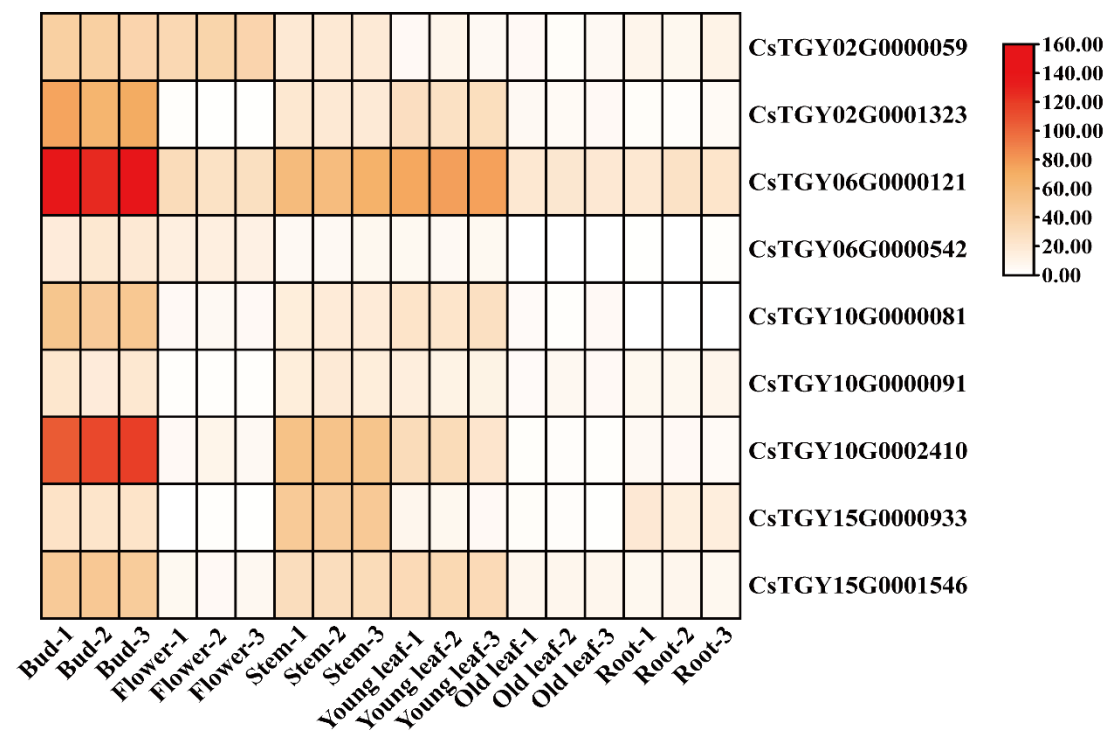

**Figure S6.** Tissue-specific gene expression patterns of nine *SPL* genes targeted by *csn-miR156f-2-5p* in bud, flower, stem, leaf, and root.
