# Supplementary material for: Identification and Validation of the miR156 Family Involved in Drought Responses and Tolerance in Tea Plants (Camellia sinensis (L.) O. Kuntze)
Source: Plants (Basel). 2024 Jan 11;13(2):201. doi: 10.3390/plants13020201 (PMC10819883; doi:10.3390/plants13020201)
Supplement: Supplementary file 1 [file plants-13-00201-s001.zip › Supplementary Material(Table).xlsx]

## Sheet: Table S1
Table S1. Cis-Acting regulatory elements analysis of MIR156 promoters
MIR156	Site Name	Sequence	Position	Strand	Function
csn-MIR156a-1	TC-rich repeats	GTTTTCTTAC	1231	+	Defense and stress responsive element
csn-MIR156a-1	AE-box	AGAAACTT	928	+	Light responsive element
csn-MIR156a-1	ABRE	ACGTG	1210	-	Abscisic acid responsive element
csn-MIR156a-1	ABRE	ACGTG	1227	+	Abscisic acid responsive element
csn-MIR156a-1	ARE	AAACCA	334	+	Anaerobic responsive element
csn-MIR156a-1	Gap-box	CAAATGAA(A/G)A	796	+	Light responsive element
csn-MIR156a-1	AuxRR-core	GGTCCAT	808	+	Auxin responsive element
csn-MIR156a-1	AuxRR-core	GGTCCAT	993	-	Auxin responsive element
csn-MIR156a-1	G-box	CACGAC	673	+	Light responsive element
csn-MIR156a-1	G-box	CACGTC	1210	+	Light responsive element
csn-MIR156a-1	G-box	TACGTG	1226	+	Light responsive element
csn-MIR156a-1	GATA-motif	AAGGATAAGG	73	+	Light responsive element
csn-MIR156a-1	GATA-motif	GATAGGA	112	-	Light responsive element
csn-MIR156a-1	O2-site	GATGA(C/T)(A/G)TG(A/G)	393	+	Zein metabolism responsive element
csn-MIR156a-1	O2-site	GATGA(C/T)(A/G)TG(A/G)	1093	-	Zein metabolism responsive element
csn-MIR156a-1	P-box	CCTTTTG	1714	-	Gibberellin responsive element
csn-MIR156a-1	TGACG-motif	TGACG	267	+	MeJA responsive element
csn-MIR156a-1	I-box	ccttatcct	74	-	Light responsive element
csn-MIR156a-1	I-box	GTATAAGGCC	1063	-	Light responsive element
csn-MIR156a-1	TCA-element	CCATCTTTTT	6	+	Salicylic acid responsive element
csn-MIR156a-1	TCA-element	CCATCTTTTT	715	+	Salicylic acid responsive element
csn-MIR156a-1	GT1-motif	GGTTAAT	878	+	Light responsive element
csn-MIR156a-1	CGTCA-motif	CGTCA	267	-	MeJA responsive element
csn-MIR156a-1	Box 4	ATTAAT	474	+	Light responsive element
csn-MIR156a-1	Box 4	ATTAAT	1431	-	Light responsive element
csn-MIR156a-1	Box 4	ATTAAT	1513	-	Light responsive element
csn-MIR156a-1	MBS	CAACTG	510	+	Drought responsive element
csn-MIR156a-1	MBS	CAACTG	1861	-	Drought responsive element
csn-MIR156a-1	MBS	CAACTG	1891	-	Drought responsive element
csn-MIR156a-2	MBS	CAACTG	751	+	Drought responsive element
csn-MIR156a-2	CGTCA-motif	CGTCA	508	-	MeJA responsive element
csn-MIR156a-2	Box 4	ATTAAT	715	+	Light responsive element
csn-MIR156a-2	Box 4	ATTAAT	1672	-	Light responsive element
csn-MIR156a-2	Box 4	ATTAAT	1754	-	Light responsive element
csn-MIR156a-2	circadian	CAAAGATATC	126	-	Circadian responsive element
csn-MIR156a-2	CCAAT-box	CAACGG	1096	+	MYBHv1 binding site
csn-MIR156a-2	I-box	ccttatcct	315	-	Light responsive element
csn-MIR156a-2	I-box	GTATAAGGCC	1304	-	Light responsive element
csn-MIR156a-2	GT1-motif	GGTTAAT	1119	+	Light responsive element
csn-MIR156a-2	TCA-element	CCATCTTTTT	247	+	Salicylic acid responsive element
csn-MIR156a-2	TCA-element	CCATCTTTTT	956	+	Salicylic acid responsive element
csn-MIR156a-2	GATA-motif	AAGGATAAGG	314	+	Light responsive element
csn-MIR156a-2	GATA-motif	GATAGGA	353	-	Light responsive element
csn-MIR156a-2	O2-site	GATGA(C/T)(A/G)TG(A/G)	164	+	Zein metabolism responsive element
csn-MIR156a-2	O2-site	GATGA(C/T)(A/G)TG(A/G)	634	+	Zein metabolism responsive element
csn-MIR156a-2	O2-site	GATGA(C/T)(A/G)TG(A/G)	1334	-	Zein metabolism responsive element
csn-MIR156a-2	P-box	CCTTTTG	1955	-	Gibberellin responsive element
csn-MIR156a-2	TGACG-motif	TGACG	508	+	MeJA responsive element
csn-MIR156a-2	AuxRR-core	GGTCCAT	1049	+	Auxin responsive element
csn-MIR156a-2	AuxRR-core	GGTCCAT	1234	-	Auxin responsive element
csn-MIR156a-2	G-box	CACGAC	914	+	Light responsive element
csn-MIR156a-2	G-box	CACGTC	1451	+	Light responsive element
csn-MIR156a-2	G-box	TACGTG	1467	+	Light responsive element
csn-MIR156a-2	ARE	AAACCA	147	+	Anaerobic responsive element
csn-MIR156a-2	ARE	AAACCA	575	+	Anaerobic responsive element
csn-MIR156a-2	Gap-box	CAAATGAA(A/G)A	1037	+	Light responsive element
csn-MIR156a-2	TC-rich repeats	GTTTTCTTAC	1472	+	Defense and stress responsive element
csn-MIR156a-2	AE-box	AGAAACTT	1169	+	Light responsive element
csn-MIR156a-2	ABRE	ACGTG	1451	-	Abscisic acid responsive element
csn-MIR156a-2	ABRE	ACGTG	1468	+	Abscisic acid responsive element
csn-MIR156a-4	GATA-motif	AAGGATAAGG	340	+	Light responsive element
csn-MIR156a-4	GATA-motif	GATAGGA	379	-	Light responsive element
csn-MIR156a-4	TGACG-motif	TGACG	534	+	MeJA responsive element
csn-MIR156a-4	P-box	CCTTTTG	1981	-	Gibberellin responsive element
csn-MIR156a-4	O2-site	GATGA(C/T)(A/G)TG(A/G)	190	+	Zein metabolism responsive element
csn-MIR156a-4	O2-site	GATGA(C/T)(A/G)TG(A/G)	660	+	Zein metabolism responsive element
csn-MIR156a-4	O2-site	GATGA(C/T)(A/G)TG(A/G)	1360	-	Zein metabolism responsive element
csn-MIR156a-4	AuxRR-core	GGTCCAT	1075	+	Auxin responsive element
csn-MIR156a-4	AuxRR-core	GGTCCAT	1260	-	Auxin responsive element
csn-MIR156a-4	G-box	CACGAC	940	+	Light responsive element
csn-MIR156a-4	G-box	CACGTC	1477	+	Light responsive element
csn-MIR156a-4	G-box	TACGTG	1493	+	Light responsive element
csn-MIR156a-4	Gap-box	CAAATGAA(A/G)A	1063	+	Light responsive element
csn-MIR156a-4	ARE	AAACCA	173	+	Anaerobic responsive element
csn-MIR156a-4	ARE	AAACCA	601	+	Anaerobic responsive element
csn-MIR156a-4	TC-rich repeats	GTTTTCTTAC	1498	+	Defense and stress responsive element
csn-MIR156a-4	ABRE	ACGTG	1477	-	Abscisic acid responsive element
csn-MIR156a-4	ABRE	ACGTG	1494	+	Abscisic acid responsive element
csn-MIR156a-4	AE-box	AGAAACTT	1195	+	Light responsive element
csn-MIR156a-4	MBS	CAACTG	777	+	Drought responsive element
csn-MIR156a-4	Box 4	ATTAAT	741	+	Light responsive element
csn-MIR156a-4	Box 4	ATTAAT	1698	-	Light responsive element
csn-MIR156a-4	Box 4	ATTAAT	1780	-	Light responsive element
csn-MIR156a-4	CGTCA-motif	CGTCA	534	-	MeJA responsive element
csn-MIR156a-4	circadian	CAAAGATATC	152	-	Circadian responsive element
csn-MIR156a-4	CCAAT-box	CAACGG	1122	+	MYBHv1 binding site
csn-MIR156a-4	GT1-motif	GGTTAAT	1145	+	Light responsive element
csn-MIR156a-4	TCA-element	CCATCTTTTT	273	+	Salicylic acid responsive element
csn-MIR156a-4	TCA-element	CCATCTTTTT	982	+	Salicylic acid responsive element
csn-MIR156a-4	I-box	ccttatcct	341	-	Light responsive element
csn-MIR156a-4	I-box	GTATAAGGCC	1330	-	Light responsive element
csn-MIR156a-3	ARE	AAACCA	182	+	Anaerobic responsive element
csn-MIR156a-3	ARE	AAACCA	610	+	Anaerobic responsive element
csn-MIR156a-3	Gap-box	CAAATGAA(A/G)A	1072	+	Light responsive element
csn-MIR156a-3	TC-rich repeats	GTTTTCTTAC	1507	+	Defense and stress responsive element
csn-MIR156a-3	AE-box	AGAAACTT	1204	+	Light responsive element
csn-MIR156a-3	ABRE	ACGTG	1486	-	Abscisic acid responsive element
csn-MIR156a-3	ABRE	ACGTG	1503	+	Abscisic acid responsive element
csn-MIR156a-3	GATA-motif	AAGGATAAGG	349	+	Light responsive element
csn-MIR156a-3	GATA-motif	GATAGGA	388	-	Light responsive element
csn-MIR156a-3	P-box	CCTTTTG	1990	-	Gibberellin responsive element
csn-MIR156a-3	O2-site	GATGA(C/T)(A/G)TG(A/G)	199	+	Zein metabolism responsive element
csn-MIR156a-3	O2-site	GATGA(C/T)(A/G)TG(A/G)	669	+	Zein metabolism responsive element
csn-MIR156a-3	O2-site	GATGA(C/T)(A/G)TG(A/G)	1369	-	Zein metabolism responsive element
csn-MIR156a-3	TGACG-motif	TGACG	543	+	MeJA responsive element
csn-MIR156a-3	AuxRR-core	GGTCCAT	1084	+	Auxin responsive element
csn-MIR156a-3	AuxRR-core	GGTCCAT	1269	-	Auxin responsive element
csn-MIR156a-3	G-box	CACGAC	949	+	Light responsive element
csn-MIR156a-3	G-box	CACGTC	1486	+	Light responsive element
csn-MIR156a-3	G-box	TACGTG	1502	+	Light responsive element
csn-MIR156a-3	CCAAT-box	CAACGG	1131	+	MYBHv1 binding site
csn-MIR156a-3	I-box	ccttatcct	350	-	Light responsive element
csn-MIR156a-3	I-box	GTATAAGGCC	1339	-	Light responsive element
csn-MIR156a-3	TCA-element	CCATCTTTTT	282	+	Salicylic acid responsive element
csn-MIR156a-3	TCA-element	CCATCTTTTT	991	+	Salicylic acid responsive element
csn-MIR156a-3	GT1-motif	GGTTAAT	1154	+	Light responsive element
csn-MIR156a-3	MBS	CAACTG	786	+	Drought responsive element
csn-MIR156a-3	CGTCA-motif	CGTCA	543	-	MeJA responsive element
csn-MIR156a-3	Box 4	ATTAAT	750	+	Light responsive element
csn-MIR156a-3	Box 4	ATTAAT	1707	-	Light responsive element
csn-MIR156a-3	Box 4	ATTAAT	1789	-	Light responsive element
csn-MIR156a-3	circadian	CAAAGATATC	161	-	Circadian responsive element
csn-MIR156b-5	GT1-motif	GGTTAA	1141	-	Light responsive element
csn-MIR156b-5	TCA-element	CCATCTTTTT	746	+	Salicylic acid responsive element
csn-MIR156b-5	TCA-element	CCATCTTTTT	783	+	Salicylic acid responsive element
csn-MIR156b-5	I-box	GATAAGGGT	1968	+	Light responsive element
csn-MIR156b-5	TGA-element	AACGAC	834	-	Auxin responsive element
csn-MIR156b-5	CCAAT-box	CAACGG	380	-	MYBHv1 binding site
csn-MIR156b-5	TCT-motif	TCTTAC	193	+	Light responsive element
csn-MIR156b-5	TCT-motif	TCTTAC	466	-	Light responsive element
csn-MIR156b-5	TCT-motif	TCTTAC	1054	-	Light responsive element
csn-MIR156b-5	AT1-motif	AATTATTTTTTATT	911	-	Light responsive element
csn-MIR156b-5	GA-motif	ATAGATAA	84	+	Light responsive element
csn-MIR156b-5	MSA-like	(T/C)C(T/C)AACGG(T/C)(T/C)A	1416	+	Cell cycle responsive element
csn-MIR156b-5	TCCC-motif	TCTCCCT	1687	+	Light responsive element
csn-MIR156b-5	CGTCA-motif	CGTCA	248	+	MeJA responsive element
csn-MIR156b-5	CGTCA-motif	CGTCA	311	+	MeJA responsive element
csn-MIR156b-5	CGTCA-motif	CGTCA	1960	-	MeJA responsive element
csn-MIR156b-5	ARE	AAACCA	16	+	Anaerobic responsive element
csn-MIR156b-5	ARE	AAACCA	1587	+	Anaerobic responsive element
csn-MIR156b-5	ARE	AAACCA	1695	+	Anaerobic responsive element
csn-MIR156b-5	ABRE	ACGTG	1320	-	Abscisic acid responsive element
csn-MIR156b-5	TGACG-motif	TGACG	248	-	MeJA responsive element
csn-MIR156b-5	TGACG-motif	TGACG	311	-	MeJA responsive element
csn-MIR156b-5	TGACG-motif	TGACG	1960	+	MeJA responsive element
csn-MIR156b-5	A-box	CCGTCC	364	-	Others
csn-MIR156b-5	MRE	AACCTAA	1989	-	Light responsive element
csn-MIR156b-5	GATA-motif	AAGGATAAGG	1965	+	Light responsive element
csn-MIR156b-5	G-box	CACGTC	1320	+	Light responsive element
csn-MIR156b-5	LTR	CCGAAA	1824	+	Low-temperature responsive element
csn-MIR156b-6	GA-motif	ATAGATAA	83	+	Light responsive element
csn-MIR156b-6	MSA-like	(T/C)C(T/C)AACGG(T/C)(T/C)A	1415	+	Cell cycle responsive element
csn-MIR156b-6	TCCC-motif	TCTCCCT	1686	+	Light responsive element
csn-MIR156b-6	CGTCA-motif	CGTCA	247	+	MeJA responsive element
csn-MIR156b-6	CGTCA-motif	CGTCA	310	+	MeJA responsive element
csn-MIR156b-6	CGTCA-motif	CGTCA	1959	-	MeJA responsive element
csn-MIR156b-6	GT1-motif	GGTTAA	1140	-	Light responsive element
csn-MIR156b-6	TCA-element	CCATCTTTTT	745	+	Salicylic acid responsive element
csn-MIR156b-6	TCA-element	CCATCTTTTT	782	+	Salicylic acid responsive element
csn-MIR156b-6	I-box	GATAAGGGT	1967	+	Light responsive element
csn-MIR156b-6	TGA-element	AACGAC	833	-	Auxin responsive element
csn-MIR156b-6	CCAAT-box	CAACGG	379	-	MYBHv1 binding site
csn-MIR156b-6	TCT-motif	TCTTAC	192	+	Light responsive element
csn-MIR156b-6	TCT-motif	TCTTAC	465	-	Light responsive element
csn-MIR156b-6	TCT-motif	TCTTAC	1053	-	Light responsive element
csn-MIR156b-6	AT1-motif	AATTATTTTTTATT	910	-	Light responsive element
csn-MIR156b-6	A-box	CCGTCC	363	-	Others
csn-MIR156b-6	TGACG-motif	TGACG	247	-	MeJA responsive element
csn-MIR156b-6	TGACG-motif	TGACG	310	-	MeJA responsive element
csn-MIR156b-6	TGACG-motif	TGACG	1959	+	MeJA responsive element
csn-MIR156b-6	MRE	AACCTAA	1988	-	Light responsive element
csn-MIR156b-6	GATA-motif	AAGGATAAGG	1964	+	Light responsive element
csn-MIR156b-6	G-box	CACGTC	1319	+	Light responsive element
csn-MIR156b-6	LTR	CCGAAA	1823	+	Low-temperature responsive element
csn-MIR156b-6	ARE	AAACCA	15	+	Anaerobic responsive element
csn-MIR156b-6	ARE	AAACCA	1586	+	Anaerobic responsive element
csn-MIR156b-6	ARE	AAACCA	1694	+	Anaerobic responsive element
csn-MIR156b-6	ABRE	ACGTG	1319	-	Abscisic acid responsive element
csn-MIR156b-7	GCN4_motif	TGAGTCA	1977	+	Endosperm responsive element
csn-MIR156b-7	ABRE	ACGTG	1074	-	Abscisic acid responsive element
csn-MIR156b-7	ARE	AAACCA	1341	+	Anaerobic responsive element
csn-MIR156b-7	ARE	AAACCA	1449	+	Anaerobic responsive element
csn-MIR156b-7	G-box	CACGTC	1074	+	Light responsive element
csn-MIR156b-7	LTR	CCGAAA	1578	+	Low-temperature responsive element
csn-MIR156b-7	GATA-motif	AAGGATAAGG	1719	+	Light responsive element
csn-MIR156b-7	MRE	AACCTAA	1743	-	Light responsive element
csn-MIR156b-7	MRE	AACCTAA	1824	-	Light responsive element
csn-MIR156b-7	TGACG-motif	TGACG	2	-	MeJA responsive element
csn-MIR156b-7	TGACG-motif	TGACG	65	-	MeJA responsive element
csn-MIR156b-7	TGACG-motif	TGACG	1714	+	MeJA responsive element
csn-MIR156b-7	A-box	CCGTCC	118	-	Others
csn-MIR156b-7	AT1-motif	AATTATTTTTTATT	665	-	Light responsive element
csn-MIR156b-7	TCT-motif	TCTTAC	220	-	Light responsive element
csn-MIR156b-7	TCT-motif	TCTTAC	808	-	Light responsive element
csn-MIR156b-7	CCAAT-box	CAACGG	134	-	MYBHv1 binding site
csn-MIR156b-7	I-box	GATAAGGGT	1722	+	Light responsive element
csn-MIR156b-7	TGA-element	AACGAC	588	-	Auxin responsive element
csn-MIR156b-7	GT1-motif	GGTTAA	895	-	Light responsive element
csn-MIR156b-7	TCA-element	CCATCTTTTT	500	+	Salicylic acid responsive element
csn-MIR156b-7	TCA-element	CCATCTTTTT	537	+	Salicylic acid responsive element
csn-MIR156b-7	CGTCA-motif	CGTCA	2	+	MeJA responsive element
csn-MIR156b-7	CGTCA-motif	CGTCA	65	+	MeJA responsive element
csn-MIR156b-7	CGTCA-motif	CGTCA	1714	-	MeJA responsive element
csn-MIR156b-7	TCCC-motif	TCTCCCT	1441	+	Light responsive element
csn-MIR156b-7	MSA-like	(T/C)C(T/C)AACGG(T/C)(T/C)A	1170	+	Cell cycle responsive element
csn-MIR156b-7	LAMP-element	CTTTATCA	1783	+	Light responsive element
csn-MIR156b-2	Box 4	ATTAAT	352	+	Light responsive element
csn-MIR156b-2	Box 4	ATTAAT	620	+	Light responsive element
csn-MIR156b-2	TCCC-motif	TCTCCCT	1098	-	Light responsive element
csn-MIR156b-2	MSA-like	(T/C)C(T/C)AACGG(T/C)(T/C)A	967	-	Cell cycle responsive element
csn-MIR156b-2	TGA-element	AACGAC	658	+	Auxin responsive element
csn-MIR156b-2	TGA-element	AACGAC	1696	-	Auxin responsive element
csn-MIR156b-2	I-box	AGATAAGG	1284	-	Light responsive element
csn-MIR156b-2	TCA-element	CCATCTTTTT	898	-	Salicylic acid responsive element
csn-MIR156b-2	GT1-motif	GGTTAAT	292	+	Light responsive element
csn-MIR156b-2	GT1-motif	GGTTAAT	1720	-	Light responsive element
csn-MIR156b-2	GT1-motif	GGTTAA	1721	-	Light responsive element
csn-MIR156b-2	G-box	TAACACGTAG	104	+	Light responsive element
csn-MIR156b-2	G-box	CACGTC	1342	+	Light responsive element
csn-MIR156b-2	MRE	AACCTAA	1421	-	Light responsive element
csn-MIR156b-2	P-box	CCTTTTG	1757	-	Gibberellin responsive element
csn-MIR156b-2	O2-site	GATGA(C/T)(A/G)TG(A/G)	218	+	Zein metabolism responsive element
csn-MIR156b-2	AE-box	AGAAACAA	1052	+	Light responsive element
csn-MIR156b-2	AE-box	AGAAACAA	1702	-	Light responsive element
csn-MIR156b-2	ABRE	ACGTG	1342	-	Abscisic acid responsive element
csn-MIR156b-2	ARE	AAACCA	1093	+	Anaerobic responsive element
csn-MIR156b-2	ARE	AAACCA	1636	+	Anaerobic responsive element
csn-MIR156b-2	Gap-box	CAAATGAA(A/G)A	1165	+	Light responsive element
csn-MIR156b-3	I-box	AGATAAGG	1243	-	Light responsive element
csn-MIR156b-3	TGA-element	AACGAC	617	+	Auxin responsive element
csn-MIR156b-3	TGA-element	AACGAC	1655	-	Auxin responsive element
csn-MIR156b-3	TCA-element	CCATCTTTTT	857	-	Salicylic acid responsive element
csn-MIR156b-3	GT1-motif	GGTTAAT	251	+	Light responsive element
csn-MIR156b-3	GT1-motif	GGTTAAT	1679	-	Light responsive element
csn-MIR156b-3	GT1-motif	GGTTAA	1680	-	Light responsive element
csn-MIR156b-3	MSA-like	(T/C)C(T/C)AACGG(T/C)(T/C)A	926	-	Cell cycle responsive element
csn-MIR156b-3	TCCC-motif	TCTCCCT	1057	-	Light responsive element
csn-MIR156b-3	TCCC-motif	TCTCCCT	1975	-	Light responsive element
csn-MIR156b-3	Box 4	ATTAAT	311	+	Light responsive element
csn-MIR156b-3	Box 4	ATTAAT	579	+	Light responsive element
csn-MIR156b-3	AE-box	AGAAACAA	1011	+	Light responsive element
csn-MIR156b-3	AE-box	AGAAACAA	1661	-	Light responsive element
csn-MIR156b-3	ABRE	ACGTG	1301	-	Abscisic acid responsive element
csn-MIR156b-3	ARE	AAACCA	1052	+	Anaerobic responsive element
csn-MIR156b-3	ARE	AAACCA	1595	+	Anaerobic responsive element
csn-MIR156b-3	Gap-box	CAAATGAA(A/G)A	1124	+	Light responsive element
csn-MIR156b-3	G-box	TAACACGTAG	63	+	Light responsive element
csn-MIR156b-3	G-box	CACGTC	1301	+	Light responsive element
csn-MIR156b-3	MRE	AACCTAA	1380	-	Light responsive element
csn-MIR156b-3	O2-site	GATGA(C/T)(A/G)TG(A/G)	177	+	Zein metabolism responsive element
csn-MIR156b-3	P-box	CCTTTTG	1716	-	Gibberellin responsive element
csn-MIR156b-3	ARE	AAACCA	1189	+	Anaerobic responsive element
csn-MIR156b-3	ARE	AAACCA	1910	-	Anaerobic responsive element
csn-MIR156b-3	ABRE	ACGTG	287	-	Abscisic acid responsive element
csn-MIR156b-3	AE-box	AGAAACTT	1330	-	Light responsive element
csn-MIR156b-3	GCN4_motif	TGAGTCA	657	+	Endosperm responsive element
csn-MIR156b-3	GCN4_motif	TGAGTCA	1616	+	Endosperm responsive element
csn-MIR156b-3	ATCT-motif	AATCTAATCC	1693	+	Light responsive element
csn-MIR156b-3	G-box	CACGTC	287	+	Light responsive element
csn-MIR156b-3	TGA-element	AACGAC	1057	+	Auxin responsive element
csn-MIR156b-3	TGA-element	AACGAC	1088	+	Auxin responsive element
csn-MIR156b-3	ATC-motif	AGTAATCT	1828	+	Light responsive element
csn-MIR156b-3	TCT-motif	TCTTAC	649	+	Light responsive element
csn-MIR156b-3	AT-rich element	ATAGAAATCAA	78	+	AT-rich responsive element
csn-MIR156b-3	GA-motif	ATAGATAA	522	-	Light responsive element
csn-MIR156b-3	MBS	CAACTG	1590	-	Drought responsive element
csn-MIR156b-4	MRE	AACCTAA	221	-	Light responsive element
csn-MIR156b-4	TCCC-motif	TCTCCCT	1817	+	Light responsive element
csn-MIR156b-4	TCCC-motif	TCTCCCT	1883	+	Light responsive element
csn-MIR156b-4	Box 4	ATTAAT	158	+	Light responsive element
csn-MIR156b-4	Box 4	ATTAAT	882	+	Light responsive element
csn-MIR156b-4	Box 4	ATTAAT	1304	-	Light responsive element
csn-MIR156b-4	CAT-box	GCCACT	1834	+	Meristem responsive element
csn-MIR156b-4	ARE	AAACCA	62	+	Anaerobic responsive element
csn-MIR156b-4	ARE	AAACCA	858	+	Anaerobic responsive element
csn-MIR156b-4	ARE	AAACCA	1113	-	Anaerobic responsive element
csn-MIR156c-2	CCAAT-box	CAACGG	15	+	MYBHv1 binding site
csn-MIR156c-2	TCA-element	CCATCTTTTT	1102	-	Salicylic acid responsive element
csn-MIR156c-2	GT1-motif	GGTTAA	388	-	Light responsive element
csn-MIR156c-2	GT1-motif	GGTTAA	1433	+	Light responsive element
csn-MIR156c-2	GT1-motif	GGTTAA	1573	-	Light responsive element
csn-MIR156c-2	chs-CMA1a	TTACTTAA	257	-	Light responsive element
csn-MIR156c-2	MBSI	aaaAaaC(G/C)GTTA	389	-	Flavonoid biosynthetic responsive element
csn-MIR156c-2	MBS	CAACTG	1681	-	Drought responsive element
csn-MIR156c-2	Box 4	ATTAAT	489	+	Light responsive element
csn-MIR156c-2	Box 4	ATTAAT	520	+	Light responsive element
csn-MIR156c-2	Box 4	ATTAAT	730	+	Light responsive element
csn-MIR156c-2	Box 4	ATTAAT	1185	-	Light responsive element
csn-MIR156c-2	ARE	AAACCA	1713	+	Anaerobic responsive element
csn-MIR156c-2	ARE	AAACCA	1735	+	Anaerobic responsive element
csn-MIR156c-2	G-Box	TCCACATGGCA	1058	-	Light responsive element
csn-MIR156c-2	TATC-box	TATCCCA	1628	+	Gibberellin responsive element
csn-MIR156c-2	ABRE	TACGTGTC	56	-	Abscisic acid responsive element
csn-MIR156c-2	ABRE	ACGTG	58	-	Abscisic acid responsive element
csn-MIR156c-2	ABRE	ACGTG	794	+	Abscisic acid responsive element
csn-MIR156c-2	ABRE	AACCCGG	1575	+	Abscisic acid responsive element
csn-MIR156c-2	MRE	AACCTAA	1933	-	Light responsive element
csn-MIR156c-2	O2-site	GTTGACGTGA	1703	-	Zein metabolism responsive element
csn-MIR156c-2	L-box	ATCCCACCTAC	1652	-	Light responsive element
csn-MIR156c-2	G-box	TACGTG	58	-	Light responsive element
csn-MIR156c-2	G-box	TACGTG	793	+	Light responsive element
csn-MIR156c-3	chs-CMA1a	TTACTTAA	14	-	Light responsive element
csn-MIR156c-3	GT1-motif	GGTTAA	145	-	Light responsive element
csn-MIR156c-3	GT1-motif	GGTTAA	1190	+	Light responsive element
csn-MIR156c-3	GT1-motif	GGTTAA	1330	-	Light responsive element
csn-MIR156c-3	TCA-element	CCATCTTTTT	859	-	Salicylic acid responsive element
csn-MIR156c-3	MBS	CAACTG	1438	-	Drought responsive element
csn-MIR156c-3	MBSI	aaaAaaC(G/C)GTTA	146	-	Flavonoid biosynthetic responsive element
csn-MIR156c-3	Box 4	ATTAAT	246	+	Light responsive element
csn-MIR156c-3	Box 4	ATTAAT	277	+	Light responsive element
csn-MIR156c-3	Box 4	ATTAAT	487	+	Light responsive element
csn-MIR156c-3	Box 4	ATTAAT	942	+	Light responsive element
csn-MIR156c-3	G-Box	TCCACATGGCA	815	-	Light responsive element
csn-MIR156c-3	ARE	AAACCA	1470	+	Anaerobic responsive element
csn-MIR156c-3	ARE	AAACCA	1492	+	Anaerobic responsive element
csn-MIR156c-3	ARE	AAACCA	1837	-	Anaerobic responsive element
csn-MIR156c-3	ABRE	ACGTG	551	+	Abscisic acid responsive element
csn-MIR156c-3	ABRE	AACCCGG	1332	+	Abscisic acid responsive element
csn-MIR156c-3	GCN4_motif	TGAGTCA	1958	+	Endosperm responsive element
csn-MIR156c-3	TATC-box	TATCCCA	1385	+	Gibberellin responsive element
csn-MIR156c-3	O2-site	GTTGACGTGA	1460	-	Zein metabolism responsive element
csn-MIR156c-3	MRE	AACCTAA	1690	-	Light responsive element
csn-MIR156c-3	G-box	TACGTG	550	+	Light responsive element
csn-MIR156c-3	L-box	ATCCCACCTAC	1409	-	Light responsive element
csn-MIR156c-1	Box 4	ATTAAT	903	+	Light responsive element
csn-MIR156c-1	CGTCA-motif	CGTCA	262	+	MeJA responsive element
csn-MIR156c-1	CGTCA-motif	CGTCA	1481	-	MeJA responsive element
csn-MIR156c-1	circadian	CAAAGATATC	523	+	Circadian responsive element
csn-MIR156c-1	MBS	CAACTG	62	+	Drought responsive element
csn-MIR156c-1	MBS	CAACTG	385	-	Drought responsive element
csn-MIR156c-1	TCT-motif	TCTTAC	458	+	Light responsive element
csn-MIR156c-1	TCT-motif	TCTTAC	606	-	Light responsive element
csn-MIR156c-1	CCAAT-box	CAACGG	1625	-	MYBHv1 binding site
csn-MIR156c-1	GT1-motif	GTGTGTGAA	569	-	Light responsive element
csn-MIR156c-1	GT1-motif	GGTTAAT	1874	-	Light responsive element
csn-MIR156c-1	GT1-motif	GGTTAA	1875	-	Light responsive element
csn-MIR156c-1	CAT-box	GCCACT	707	-	Meristem responsive element
csn-MIR156c-1	AuxRR-core	GGTCCAT	1416	+	Auxin responsive element
csn-MIR156c-1	G-box	CACGAC	1148	-	Light responsive element
csn-MIR156c-1	G-box	CAGACGTGGCA	1455	+	Light responsive element
csn-MIR156c-1	G-box	CACGTC	1457	-	Light responsive element
csn-MIR156c-1	TGACG-motif	TGACG	262	-	MeJA responsive element
csn-MIR156c-1	TGACG-motif	TGACG	1481	+	MeJA responsive element
csn-MIR156c-1	ABRE	ACGTG	1458	+	Abscisic acid responsive element
csn-MIR156c-1	AE-box	AGAAACAA	1446	-	Light responsive element
csn-MIR156c-1	AE-box	AGAAACAA	1527	-	Light responsive element
csn-MIR156c-1	ARE	AAACCA	13	-	Anaerobic responsive element
csn-MIR156c-1	ARE	AAACCA	111	-	Anaerobic responsive element
csn-MIR156c-1	ARE	AAACCA	1330	-	Anaerobic responsive element
csn-MIR156c-1	ARE	AAACCA	1499	+	Anaerobic responsive element
csn-MIR156c-1	ARE	AAACCA	1629	-	Anaerobic responsive element
csn-MIR156d-4	ARE	AAACCA	142	-	Anaerobic responsive element
csn-MIR156d-4	ARE	AAACCA	540	+	Anaerobic responsive element
csn-MIR156d-4	ARE	AAACCA	1357	-	Anaerobic responsive element
csn-MIR156d-4	ARE	AAACCA	1651	-	Anaerobic responsive element
csn-MIR156d-4	ABRE	ACGTG	1485	+	Abscisic acid responsive element
csn-MIR156d-4	AE-box	AGAAACAA	1473	-	Light responsive element
csn-MIR156d-4	AE-box	AGAAACAA	1549	-	Light responsive element
csn-MIR156d-4	TGACG-motif	TGACG	293	-	MeJA responsive element
csn-MIR156d-4	TGACG-motif	TGACG	323	-	MeJA responsive element
csn-MIR156d-4	TGACG-motif	TGACG	1503	+	MeJA responsive element
csn-MIR156d-4	G-box	CACGAC	1175	-	Light responsive element
csn-MIR156d-4	G-box	CAGACGTGGCA	1482	+	Light responsive element
csn-MIR156d-4	G-box	CACGTC	1484	-	Light responsive element
csn-MIR156d-4	AuxRR-core	GGTCCAT	260	+	Auxin responsive element
csn-MIR156d-4	AuxRR-core	GGTCCAT	1443	+	Auxin responsive element
csn-MIR156d-4	AuxRR-core	GGTCCAT	1671	+	Auxin responsive element
csn-MIR156d-4	GT1-motif	GTGTGTGAA	600	-	Light responsive element
csn-MIR156d-4	GT1-motif	GGTTAA	1605	-	Light responsive element
csn-MIR156d-4	CAT-box	GCCACT	738	-	Meristem responsive element
csn-MIR156d-4	ATC-motif	AGCTATCCA	1767	-	Light responsive element
csn-MIR156d-4	CCAAT-box	CAACGG	1647	-	MYBHv1 binding site
csn-MIR156d-4	TCT-motif	TCTTAC	637	-	Light responsive element
csn-MIR156d-4	MBS	CAACTG	416	-	Drought responsive element
csn-MIR156d-4	MBS	CAACTG	453	-	Drought responsive element
csn-MIR156d-4	circadian	CAAAGATATC	554	+	Circadian responsive element
csn-MIR156d-4	CGTCA-motif	CGTCA	293	+	MeJA responsive element
csn-MIR156d-4	CGTCA-motif	CGTCA	323	+	MeJA responsive element
csn-MIR156d-4	CGTCA-motif	CGTCA	1503	-	MeJA responsive element
csn-MIR156d-1	Box II	CCACGTGGC	145	-	Light responsive element
csn-MIR156d-1	RY-element	CATGCATG	1637	-	Seed responsive element
csn-MIR156d-1	GT1-motif	GGTTAA	534	-	Light responsive element
csn-MIR156d-1	GT1-motif	GGTTAAT	838	+	Light responsive element
csn-MIR156d-1	GT1-motif	GTGTGTGAA	1481	-	Light responsive element
csn-MIR156d-1	CGTCA-motif	CGTCA	726	-	MeJA responsive element
csn-MIR156d-1	Box 4	ATTAAT	280	+	Light responsive element
csn-MIR156d-1	Box 4	ATTAAT	753	+	Light responsive element
csn-MIR156d-1	Box 4	ATTAAT	789	+	Light responsive element
csn-MIR156d-1	Box 4	ATTAAT	922	+	Light responsive element
csn-MIR156d-1	Box 4	ATTAAT	1137	-	Light responsive element
csn-MIR156d-1	TCCC-motif	TCTCCCT	344	+	Light responsive element
csn-MIR156d-1	MBS	CAACTG	1552	-	Drought responsive element
csn-MIR156d-1	ABRE	CACGTG	147	+	Abscisic acid responsive element
csn-MIR156d-1	ABRE	ACGTG	148	+	Abscisic acid responsive element
csn-MIR156d-1	ABRE	CACGTG	162	+	Abscisic acid responsive element
csn-MIR156d-1	ABRE	ACGTG	163	+	Abscisic acid responsive element
csn-MIR156d-1	WUN-motif	AAATTTCCT	42	+	Wound responsive element
csn-MIR156d-1	G-Box	CACGTG	147	+	Light responsive element
csn-MIR156d-1	G-Box	CACGTG	162	+	Light responsive element
csn-MIR156d-1	ARE	AAACCA	367	-	Anaerobic responsive element
csn-MIR156d-1	G-box	GCCACGTGGA	145	+	Light responsive element
csn-MIR156d-1	G-box	CACGTG	147	+	Light responsive element
csn-MIR156d-1	G-box	CACGTG	162	+	Light responsive element
csn-MIR156d-1	GC-motif	CCCCCG	1287	+	Anoxic responsive element
csn-MIR156d-1	MRE	AACCTAA	1206	+	Light responsive element
csn-MIR156d-1	O2-site	GATGACATGG	1960	+	Zein metabolism responsive element
csn-MIR156d-1	TGACG-motif	TGACG	726	+	MeJA responsive element
csn-MIR156d-1	GATA-motif	GATAGGA	47	-	Light responsive element
csn-MIR156d-2	MBS	CAACTG	1551	-	Drought responsive element
csn-MIR156d-2	TCCC-motif	TCTCCCT	343	+	Light responsive element
csn-MIR156d-2	Box 4	ATTAAT	279	+	Light responsive element
csn-MIR156d-2	Box 4	ATTAAT	752	+	Light responsive element
csn-MIR156d-2	Box 4	ATTAAT	788	+	Light responsive element
csn-MIR156d-2	Box 4	ATTAAT	921	+	Light responsive element
csn-MIR156d-2	Box 4	ATTAAT	1136	-	Light responsive element
csn-MIR156d-2	CGTCA-motif	CGTCA	725	-	MeJA responsive element
csn-MIR156d-2	GT1-motif	GGTTAA	533	-	Light responsive element
csn-MIR156d-2	GT1-motif	GGTTAAT	837	+	Light responsive element
csn-MIR156d-2	GT1-motif	GTGTGTGAA	1480	-	Light responsive element
csn-MIR156d-2	RY-element	CATGCATG	1636	-	Seed responsive element
csn-MIR156d-2	Box II	CCACGTGGC	144	-	Light responsive element
csn-MIR156d-2	GATA-motif	GATAGGA	46	-	Light responsive element
csn-MIR156d-2	TGACG-motif	TGACG	725	+	MeJA responsive element
csn-MIR156d-2	O2-site	GATGACATGG	1959	+	Zein metabolism responsive element
csn-MIR156d-2	MRE	AACCTAA	1205	+	Light responsive element
csn-MIR156d-2	GC-motif	CCCCCG	1286	+	Anoxic responsive element
csn-MIR156d-2	G-box	GCCACGTGGA	144	+	Light responsive element
csn-MIR156d-2	G-box	CACGTG	146	+	Light responsive element
csn-MIR156d-2	G-box	CACGTG	161	+	Light responsive element
csn-MIR156d-2	ARE	AAACCA	366	-	Anaerobic responsive element
csn-MIR156d-2	G-Box	CACGTG	146	+	Light responsive element
csn-MIR156d-2	G-Box	CACGTG	161	+	Light responsive element
csn-MIR156d-2	ABRE	CACGTG	146	+	Abscisic acid responsive element
csn-MIR156d-2	ABRE	ACGTG	147	+	Abscisic acid responsive element
csn-MIR156d-2	ABRE	CACGTG	161	+	Abscisic acid responsive element
csn-MIR156d-2	ABRE	ACGTG	162	+	Abscisic acid responsive element
csn-MIR156d-2	WUN-motif	AAATTTCCT	41	+	Wound responsive element
csn-MIR156d-3	GC-motif	CCCCCG	1283	+	Anoxic responsive element
csn-MIR156d-3	G-box	GCCACGTGGA	141	+	Light responsive element
csn-MIR156d-3	G-box	CACGTG	143	+	Light responsive element
csn-MIR156d-3	G-box	CACGTG	158	+	Light responsive element
csn-MIR156d-3	GATA-motif	GATAGGA	43	-	Light responsive element
csn-MIR156d-3	TGACG-motif	TGACG	722	+	MeJA responsive element
csn-MIR156d-3	MRE	AACCTAA	1202	+	Light responsive element
csn-MIR156d-3	O2-site	GATGACATGG	1956	+	Zein metabolism responsive element
csn-MIR156d-3	WUN-motif	AAATTTCCT	38	+	Wound responsive element
csn-MIR156d-3	ABRE	CACGTG	143	+	Abscisic acid responsive element
csn-MIR156d-3	ABRE	ACGTG	144	+	Abscisic acid responsive element
csn-MIR156d-3	ABRE	CACGTG	158	+	Abscisic acid responsive element
csn-MIR156d-3	ABRE	ACGTG	159	+	Abscisic acid responsive element
csn-MIR156d-3	ARE	AAACCA	363	-	Anaerobic responsive element
csn-MIR156d-3	G-Box	CACGTG	143	+	Light responsive element
csn-MIR156d-3	G-Box	CACGTG	158	+	Light responsive element
csn-MIR156d-3	Box 4	ATTAAT	276	+	Light responsive element
csn-MIR156d-3	Box 4	ATTAAT	749	+	Light responsive element
csn-MIR156d-3	Box 4	ATTAAT	785	+	Light responsive element
csn-MIR156d-3	Box 4	ATTAAT	918	+	Light responsive element
csn-MIR156d-3	Box 4	ATTAAT	1133	-	Light responsive element
csn-MIR156d-3	TCCC-motif	TCTCCCT	340	+	Light responsive element
csn-MIR156d-3	CGTCA-motif	CGTCA	722	-	MeJA responsive element
csn-MIR156d-3	MBS	CAACTG	1548	-	Drought responsive element
csn-MIR156d-3	RY-element	CATGCATG	1633	-	Seed responsive element
csn-MIR156d-3	Box II	CCACGTGGC	141	-	Light responsive element
csn-MIR156d-3	GT1-motif	GGTTAA	530	-	Light responsive element
csn-MIR156d-3	GT1-motif	GGTTAAT	834	+	Light responsive element
csn-MIR156d-3	GT1-motif	GTGTGTGAA	1477	-	Light responsive element
csn-MIR156e	ACE	GACACGTATG	1436	-	Light responsive element
csn-MIR156e	GT1-motif	GGTTAA	1394	+	Light responsive element
csn-MIR156e	TCA-element	CCATCTTTTT	309	-	Salicylic acid responsive element
csn-MIR156e	TGA-element	AACGAC	1512	+	Auxin responsive element
csn-MIR156e	TGA-box	TGACGTAA	977	+	Auxin responsive element
csn-MIR156e	CCAAT-box	CAACGG	332	+	MYBHv1 binding site
csn-MIR156e	CCAAT-box	CAACGG	1341	+	MYBHv1 binding site
csn-MIR156e	CCAAT-box	CAACGG	1357	+	MYBHv1 binding site
csn-MIR156e	circadian	CAAAGATATC	1448	+	Circadian responsive element
csn-MIR156e	circadian	CAAAGATATC	1843	-	Circadian responsive element
csn-MIR156e	TCCC-motif	TCTCCCT	1152	+	Light responsive element
csn-MIR156e	Box 4	ATTAAT	707	+	Light responsive element
csn-MIR156e	CGTCA-motif	CGTCA	228	+	MeJA responsive element
csn-MIR156e	CGTCA-motif	CGTCA	977	-	MeJA responsive element
csn-MIR156e	ABRE	ACGTG	256	-	Abscisic acid responsive element
csn-MIR156e	ABRE	ACGTG	383	+	Abscisic acid responsive element
csn-MIR156e	ABRE	ACGTG	456	+	Abscisic acid responsive element
csn-MIR156e	ABRE	ACGTG	1429	-	Abscisic acid responsive element
csn-MIR156e	TC-rich repeats	GTTTTCTTAC	1489	-	Defense and stress responsive element
csn-MIR156e	G-Box	CACGTT	256	+	Light responsive element
csn-MIR156e	G-Box	CACGTT	382	-	Light responsive element
csn-MIR156e	ARE	AAACCA	899	+	Anaerobic responsive element
csn-MIR156e	ARE	AAACCA	923	+	Anaerobic responsive element
csn-MIR156e	ARE	AAACCA	1347	-	Anaerobic responsive element
csn-MIR156e	ARE	AAACCA	1495	+	Anaerobic responsive element
csn-MIR156e	ARE	AAACCA	1746	-	Anaerobic responsive element
csn-MIR156e	G-box	TACGTG	455	+	Light responsive element
csn-MIR156e	G-box	CACGTC	1429	+	Light responsive element
csn-MIR156e	LTR	CCGAAA	993	+	Low-temperature responsive element
csn-MIR156e	AuxRR-core	GGTCCAT	167	+	Auxin responsive element
csn-MIR156e	TGACG-motif	TGACG	228	-	MeJA responsive element
csn-MIR156e	TGACG-motif	TGACG	977	+	MeJA responsive element
csn-MIR156e	A-box	CCGTCC	317	-	Others
csn-MIR156e	O2-site	GATGATGTGG	598	-	Zein metabolism responsive element
csn-MIR156e	GATA-motif	GATAGGA	69	-	Light responsive element
csn-MIR156e	GATA-motif	GATAGGA	543	+	Light responsive element
csn-MIR156e	AT-rich sequence	TAAAATACT	1249	-	Others
csn-MIR156f-3	O2-site	GATGA(C/T)(A/G)TG(A/G)	431	-	Zein metabolism responsive element
csn-MIR156f-3	TGACG-motif	TGACG	1343	-	MeJA responsive element
csn-MIR156f-3	ATCT-motif	AATCTAATCC	1270	-	Light responsive element
csn-MIR156f-3	G-box	TAACACGTAG	1387	+	Light responsive element
csn-MIR156f-3	G-box	TACGTG	1390	-	Light responsive element
csn-MIR156f-3	G-box	CACGTC	1434	+	Light responsive element
csn-MIR156f-3	G-box	TACGTG	1637	+	Light responsive element
csn-MIR156f-3	ARE	AAACCA	696	-	Anaerobic responsive element
csn-MIR156f-3	ARE	AAACCA	797	+	Anaerobic responsive element
csn-MIR156f-3	ARE	AAACCA	1061	-	Anaerobic responsive element
csn-MIR156f-3	ARE	AAACCA	1783	+	Anaerobic responsive element
csn-MIR156f-3	AE-box	AGAAACAA	1713	-	Light responsive element
csn-MIR156f-3	ABRE	ACGTG	1390	-	Abscisic acid responsive element
csn-MIR156f-3	ABRE	ACGTG	1434	-	Abscisic acid responsive element
csn-MIR156f-3	ABRE	TACGTGTC	1637	+	Abscisic acid responsive element
csn-MIR156f-3	ABRE	ACGTG	1638	+	Abscisic acid responsive element
csn-MIR156f-3	TC-rich repeats	ATTCTCTAAC	1087	-	Defense and stress responsive element
csn-MIR156f-3	CAG-motif	GAAAGGCAGAC	1697	+	Light responsive element
csn-MIR156f-3	GA-motif	ATAGATAA	927	-	Light responsive element
csn-MIR156f-3	HD-Zip 1	CAAT(A/T)ATTG	602	+	Palisade mesophyll responsive element
csn-MIR156f-3	CGTCA-motif	CGTCA	1343	+	MeJA responsive element
csn-MIR156f-3	Box 4	ATTAAT	192	+	Light responsive element
csn-MIR156f-3	TGA-element	AACGAC	524	+	Auxin responsive element
csn-MIR156f-3	CAT-box	GCCACT	786	-	Meristem responsive element
csn-MIR156f-3	GT1-motif	GGTTAAT	828	+	Light responsive element
csn-MIR156f-3	AT1-motif	AATTATTTTTTATT	224	+	Light responsive element
csn-MIR156f-1	TGACG-motif	TGACG	1371	-	MeJA responsive element
csn-MIR156f-1	O2-site	GATGA(C/T)(A/G)TG(A/G)	459	-	Zein metabolism responsive element
csn-MIR156f-1	ATCT-motif	AATCTAATCC	1298	-	Light responsive element
csn-MIR156f-1	G-box	TAACACGTAG	1415	+	Light responsive element
csn-MIR156f-1	G-box	TACGTG	1418	-	Light responsive element
csn-MIR156f-1	G-box	CACGTC	1462	+	Light responsive element
csn-MIR156f-1	G-box	TACGTG	1665	+	Light responsive element
csn-MIR156f-1	ARE	AAACCA	724	-	Anaerobic responsive element
csn-MIR156f-1	ARE	AAACCA	825	+	Anaerobic responsive element
csn-MIR156f-1	ARE	AAACCA	1089	-	Anaerobic responsive element
csn-MIR156f-1	ARE	AAACCA	1811	+	Anaerobic responsive element
csn-MIR156f-1	ABRE	ACGTG	1418	-	Abscisic acid responsive element
csn-MIR156f-1	ABRE	ACGTG	1462	-	Abscisic acid responsive element
csn-MIR156f-1	ABRE	TACGTGTC	1665	+	Abscisic acid responsive element
csn-MIR156f-1	ABRE	ACGTG	1666	+	Abscisic acid responsive element
csn-MIR156f-1	AE-box	AGAAACAA	1741	-	Light responsive element
csn-MIR156f-1	TC-rich repeats	ATTCTCTAAC	1115	-	Defense and stress responsive element
csn-MIR156f-1	HD-Zip 1	CAAT(A/T)ATTG	630	+	Palisade mesophyll responsive element
csn-MIR156f-1	GA-motif	ATAGATAA	955	-	Light responsive element
csn-MIR156f-1	CAG-motif	GAAAGGCAGAC	1725	+	Light responsive element
csn-MIR156f-1	Box 4	ATTAAT	220	+	Light responsive element
csn-MIR156f-1	CGTCA-motif	CGTCA	1371	+	MeJA responsive element
csn-MIR156f-1	GT1-motif	GGTTAAT	856	+	Light responsive element
csn-MIR156f-1	CAT-box	GCCACT	814	-	Meristem responsive element
csn-MIR156f-1	TGA-element	AACGAC	552	+	Auxin responsive element
csn-MIR156f-1	AT1-motif	AATTATTTTTTATT	252	+	Light responsive element
csn-MIR156f-2	AE-box	AGAAACAA	1737	-	Light responsive element
csn-MIR156f-2	ABRE	ACGTG	1414	-	Abscisic acid responsive element
csn-MIR156f-2	ABRE	ACGTG	1458	-	Abscisic acid responsive element
csn-MIR156f-2	ABRE	TACGTGTC	1661	+	Abscisic acid responsive element
csn-MIR156f-2	ABRE	ACGTG	1662	+	Abscisic acid responsive element
csn-MIR156f-2	TC-rich repeats	ATTCTCTAAC	1111	-	Defense and stress responsive element
csn-MIR156f-2	ARE	AAACCA	720	-	Anaerobic responsive element
csn-MIR156f-2	ARE	AAACCA	821	+	Anaerobic responsive element
csn-MIR156f-2	ARE	AAACCA	1085	-	Anaerobic responsive element
csn-MIR156f-2	ARE	AAACCA	1807	+	Anaerobic responsive element
csn-MIR156f-2	G-box	TAACACGTAG	1411	+	Light responsive element
csn-MIR156f-2	G-box	TACGTG	1414	-	Light responsive element
csn-MIR156f-2	G-box	CACGTC	1458	+	Light responsive element
csn-MIR156f-2	G-box	TACGTG	1661	+	Light responsive element
csn-MIR156f-2	O2-site	GATGA(C/T)(A/G)TG(A/G)	455	-	Zein metabolism responsive element
csn-MIR156f-2	TGACG-motif	TGACG	1367	-	MeJA responsive element
csn-MIR156f-2	ATCT-motif	AATCTAATCC	1294	-	Light responsive element
csn-MIR156f-2	AT1-motif	AATTATTTTTTATT	248	+	Light responsive element
csn-MIR156f-2	TGA-element	AACGAC	548	+	Auxin responsive element
csn-MIR156f-2	CAT-box	GCCACT	810	-	Meristem responsive element
csn-MIR156f-2	GT1-motif	GGTTAAT	852	+	Light responsive element
csn-MIR156f-2	CGTCA-motif	CGTCA	1367	+	MeJA responsive element
csn-MIR156f-2	Box 4	ATTAAT	216	+	Light responsive element
csn-MIR156f-2	CAG-motif	GAAAGGCAGAC	1721	+	Light responsive element
csn-MIR156f-2	GA-motif	ATAGATAA	951	-	Light responsive element
csn-MIR156f-2	HD-Zip 1	CAAT(A/T)ATTG	626	+	Palisade mesophyll responsive element
csn-MIR156f-6	GC-motif	CCCCCG	1327	-	Anoxic responsive element
csn-MIR156f-6	GARE-motif	TCTGTTG	1955	-	Gibberellin responsive element
csn-MIR156f-6	TGACG-motif	TGACG	1359	+	MeJA responsive element
csn-MIR156f-6	TGACG-motif	TGACG	1418	-	MeJA responsive element
csn-MIR156f-6	Box 4	ATTAAT	25	+	Light responsive element
csn-MIR156f-6	Box 4	ATTAAT	315	+	Light responsive element
csn-MIR156f-6	TCCC-motif	TCTCCCT	1973	+	Light responsive element
csn-MIR156f-6	CGTCA-motif	CGTCA	1359	-	MeJA responsive element
csn-MIR156f-6	CGTCA-motif	CGTCA	1418	+	MeJA responsive element
csn-MIR156f-6	3-AF3 binding site	CACTATCTAAC	269	-	Others
csn-MIR156f-6	LAMP-element	CTTTATCA	233	-	Light responsive element
csn-MIR156f-6	TCT-motif	TCTTAC	593	-	Light responsive element
csn-MIR156f-6	TCT-motif	TCTTAC	1994	-	Light responsive element
csn-MIR156f-6	CCAAT-box	CAACGG	1231	+	MYBHv1 binding site
csn-MIR156f-6	I-box	TGATAATGT	599	-	Light responsive element
csn-MIR156f-7	TCT-motif	TCTTAC	600	-	Light responsive element
csn-MIR156f-7	CCAAT-box	CAACGG	1238	+	MYBHv1 binding site
csn-MIR156f-7	I-box	TGATAATGT	606	-	Light responsive element
csn-MIR156f-7	Box 4	ATTAAT	32	+	Light responsive element
csn-MIR156f-7	Box 4	ATTAAT	322	+	Light responsive element
csn-MIR156f-7	TCCC-motif	TCTCCCT	1980	+	Light responsive element
csn-MIR156f-7	CGTCA-motif	CGTCA	1366	-	MeJA responsive element
csn-MIR156f-7	CGTCA-motif	CGTCA	1425	+	MeJA responsive element
csn-MIR156f-7	3-AF3 binding site	CACTATCTAAC	276	-	Others
csn-MIR156f-7	LAMP-element	CTTTATCA	240	-	Light responsive element
csn-MIR156f-7	GC-motif	CCCCCG	1334	-	Anoxic responsive element
csn-MIR156f-7	GARE-motif	TCTGTTG	1962	-	Gibberellin responsive element
csn-MIR156f-7	TGACG-motif	TGACG	1366	+	MeJA responsive element
csn-MIR156f-7	TGACG-motif	TGACG	1425	-	MeJA responsive element
csn-MIR156f-4	CGTCA-motif	CGTCA	1374	-	MeJA responsive element
csn-MIR156f-4	CGTCA-motif	CGTCA	1433	+	MeJA responsive element
csn-MIR156f-4	TCCC-motif	TCTCCCT	1988	+	Light responsive element
csn-MIR156f-4	Box 4	ATTAAT	40	+	Light responsive element
csn-MIR156f-4	Box 4	ATTAAT	330	+	Light responsive element
csn-MIR156f-4	3-AF3 binding site	CACTATCTAAC	284	-	Others
csn-MIR156f-4	LAMP-element	CTTTATCA	248	-	Light responsive element
csn-MIR156f-4	TCT-motif	TCTTAC	608	-	Light responsive element
csn-MIR156f-4	CCAAT-box	CAACGG	1246	+	MYBHv1 binding site
csn-MIR156f-4	I-box	TGATAATGT	614	-	Light responsive element
csn-MIR156f-4	GC-motif	CCCCCG	1342	-	Anoxic responsive element
csn-MIR156f-4	GARE-motif	TCTGTTG	1970	-	Gibberellin responsive element
csn-MIR156f-4	TGACG-motif	TGACG	1374	+	MeJA responsive element
csn-MIR156f-4	TGACG-motif	TGACG	1433	-	MeJA responsive element
csn-MIR156g-1	LTR	CCGAAA	462	-	Low-temperature responsive element
csn-MIR156g-1	Unnamed__1	GAATTTAATTAA	1511	-	60K protein binding site
csn-MIR156g-1	G-Box	CACGTT	537	+	Light responsive element
csn-MIR156g-1	G-Box	CACGTT	907	+	Light responsive element
csn-MIR156g-1	ARE	AAACCA	33	-	Anaerobic responsive element
csn-MIR156g-1	ARE	AAACCA	561	-	Anaerobic responsive element
csn-MIR156g-1	ARE	AAACCA	931	+	Anaerobic responsive element
csn-MIR156g-1	ARE	AAACCA	1185	-	Anaerobic responsive element
csn-MIR156g-1	ARE	AAACCA	1935	-	Anaerobic responsive element
csn-MIR156g-1	ABRE	ACGTG	537	-	Abscisic acid responsive element
csn-MIR156g-1	ABRE	ACGTG	907	-	Abscisic acid responsive element
csn-MIR156g-1	AE-box	AGAAACAA	1872	-	Light responsive element
csn-MIR156g-1	TATC-box	TATCCCA	1538	-	Gibberellin responsive element
csn-MIR156g-1	MSA-like	TCAAACGGT	1122	+	Cell cycle responsive element
csn-MIR156g-1	TCCC-motif	TCTCCCT	1981	-	Light responsive element
csn-MIR156g-1	Box 4	ATTAAT	271	+	Light responsive element
csn-MIR156g-1	Box 4	ATTAAT	1510	-	Light responsive element
csn-MIR156g-1	Box 4	ATTAAT	1673	-	Light responsive element
csn-MIR156g-1	TCA-element	CCATCTTTTT	586	+	Salicylic acid responsive element
csn-MIR156g-1	TCA-element	CCATCTTTTT	1107	+	Salicylic acid responsive element
csn-MIR156g-1	GT1-motif	GGTTAA	1377	-	Light responsive element
csn-MIR156g-1	I-box	TAGATAACC	466	-	Light responsive element
csn-MIR156g-1	TGA-element	AACGAC	106	+	Auxin responsive element
csn-MIR156g-1	CCAAT-box	CAACGG	1134	+	MYBHv1 binding site
csn-MIR156g-1	AT1-motif	AATTATTTTTTATT	1944	-	Light responsive element
csn-MIR156g-2	ARE	AAACCA	32	-	Anaerobic responsive element
csn-MIR156g-2	ARE	AAACCA	560	-	Anaerobic responsive element
csn-MIR156g-2	ARE	AAACCA	930	+	Anaerobic responsive element
csn-MIR156g-2	ARE	AAACCA	1184	-	Anaerobic responsive element
csn-MIR156g-2	ARE	AAACCA	1934	-	Anaerobic responsive element
csn-MIR156g-2	G-Box	CACGTT	536	+	Light responsive element
csn-MIR156g-2	G-Box	CACGTT	906	+	Light responsive element
csn-MIR156g-2	Unnamed__1	GAATTTAATTAA	1510	-	60K protein binding site
csn-MIR156g-2	TATC-box	TATCCCA	1537	-	Gibberellin responsive element
csn-MIR156g-2	AE-box	AGAAACAA	1871	-	Light responsive element
csn-MIR156g-2	ABRE	ACGTG	536	-	Abscisic acid responsive element
csn-MIR156g-2	ABRE	ACGTG	906	-	Abscisic acid responsive element
csn-MIR156g-2	LTR	CCGAAA	461	-	Low-temperature responsive element
csn-MIR156g-2	CCAAT-box	CAACGG	1133	+	MYBHv1 binding site
csn-MIR156g-2	TGA-element	AACGAC	105	+	Auxin responsive element
csn-MIR156g-2	I-box	TAGATAACC	465	-	Light responsive element
csn-MIR156g-2	TCA-element	CCATCTTTTT	585	+	Salicylic acid responsive element
csn-MIR156g-2	TCA-element	CCATCTTTTT	1106	+	Salicylic acid responsive element
csn-MIR156g-2	GT1-motif	GGTTAA	1376	-	Light responsive element
csn-MIR156g-2	AT1-motif	AATTATTTTTTATT	1943	-	Light responsive element
csn-MIR156g-2	TCCC-motif	TCTCCCT	1980	-	Light responsive element
csn-MIR156g-2	Box 4	ATTAAT	270	+	Light responsive element
csn-MIR156g-2	Box 4	ATTAAT	1509	-	Light responsive element
csn-MIR156g-2	Box 4	ATTAAT	1672	-	Light responsive element
csn-MIR156g-2	MSA-like	TCAAACGGT	1121	+	Cell cycle responsive element

## Sheet: Table S2
Table S2. Summarized of target genes corresponding to csn-miR156f-2-5p
miRNA_Acc.	Target_Acc.	Expectation	miRNA_start	miRNA_end	Target_start	Target_end	miRNA_aligned_fragment	alignment	Target_aligned_fragment	Inhibition	Multiplicity	Annotation
csn-miR156f-2-5p	CsTGY06G0000542	1	1	21	1049	1069	CUGACAGAAGAGAGUGAGCAC	::::: ::::::::::::::	UUGCUCUCUCUCUUCUGUCAG	Cleavage	1	OsSPL3 - SBP-box gene family member, expressed
csn-miR156f-2-5p	CsTGY15G0001546	2	1	21	1235	1255	CUGACAGAAGAGAGUGAGCAC	:::::: :::::::::::::	GUGCUCUCUCUCUUCUGUCAU	Cleavage	1	OsSPL3 - SBP-box gene family member, expressed
csn-miR156f-2-5p	CsTGY02G0001323	2	1	21	1139	1159	CUGACAGAAGAGAGUGAGCAC	:::::: :::::::::::::	GUGCUCUCUCUCUUCUGUCAU	Cleavage	1	OsSPL3 - SBP-box gene family member, expressed
csn-miR156f-2-5p	CsTGY06G0000121	2	1	21	1118	1138	CUGACAGAAGAGAGUGAGCAC	:::::: :::::::::::::	GUGCUCUCUCUCUUCUGUCAA	Cleavage	1	OsSPL3 - SBP-box gene family member, expressed
csn-miR156f-2-5p	CsTGY10G0000091	2	1	21	1085	1105	CUGACAGAAGAGAGUGAGCAC	:::::: :::::::::::::	GUGCUCUCUCUCUUCUGUCAA	Cleavage	1	OsSPL3 - SBP-box gene family member, expressed
csn-miR156f-2-5p	CsTGY15G0000933	2	1	21	890	910	CUGACAGAAGAGAGUGAGCAC	:::::: :::::::::::::	GUGCUCUCUCUCUUCUGUCAU	Cleavage	1	OsSPL16 - SBP-box gene family member, expressed
csn-miR156f-2-5p	CsTGY10G0002410	2	1	21	782	802	CUGACAGAAGAGAGUGAGCAC	:::::: :::::::::::::	GUGCUCUCUCUCUUCUGUCAA	Cleavage	1	OsSPL17 - SBP-box gene family member, expressed
csn-miR156f-2-5p	CsTGY10G0000081	2	1	21	761	781	CUGACAGAAGAGAGUGAGCAC	:::::: :::::::::::::	GUGCUCUCUCUCUUCUGUCAU	Cleavage	1	OsSPL16 - SBP-box gene family member, expressed
csn-miR156f-2-5p	CsTGY02G0000059	2	1	21	881	901	CUGACAGAAGAGAGUGAGCAC	::::: :::::::::::::	UUGCUCUCUCUCUUCUGUCAU	Cleavage	1	OsSPL16 - SBP-box gene family member, expressed

## Sheet: Table S3
Table S3. Identified of target genes corresponding to csn-miR156f-2-5p
miRNA_Acc.	Target_Acc.	Name	Description	Scientific Name	Max Score	Total Score	Query Cover	E value	Per. Ident	Acc. Len	Accession
csn-miR156f-2-5p	CsTGY06G0000542	SPL6-1	Camellia sinensis cultivar Fudingdabai E3 ubiquitin-protein ligase SIS3-like protein mRNA, complete cds	Camellia sinensis	1881	1881	0.7	0	0.9961	1292	MK795767.1
			PREDICTED: Camellia sinensis squamosa promoter-binding-like protein 6 (LOC114294789), transcript variant X2, mRNA	Camellia sinensis	1380	1380	0.5	0	1	1408	XM_028238933.1
			PREDICTED: Camellia sinensis squamosa promoter-binding-like protein 6 (LOC114294789), transcript variant X1, mRNA	Camellia sinensis	1380	1380	0.5	0	1	1416	XM_028238932.1
	CsTGY15G0001546	SPL6-2	Camellia sinensis breed ShuChaZao squamosa promoter binding protein like 6 mRNA, complete cds	Camellia sinensis	2896	2988	1	0	0.9981	2318	KX808499.1
	CsTGY02G0001323	SPL16-2	PREDICTED: Camellia sinensis squamosa promoter-binding-like protein 16 (LOC114262927), mRNA	Camellia sinensis	2826	2826	1	0	0.9974	2277	XM_028203387.1
	CsTGY06G0000121	SPL12-1	PREDICTED: Camellia sinensis squamosa promoter-binding-like protein 12 (LOC114293884), transcript variant X5, mRNA	Camellia sinensis	2571	2571	1	0	0.9979	2012	XM_028237999.1
			PREDICTED: Camellia sinensis squamosa promoter-binding-like protein 12 (LOC114293884), transcript variant X4, mRNA	Camellia sinensis	2571	2571	1	0	0.9979	2010	XM_028237994.1
			PREDICTED: Camellia sinensis squamosa promoter-binding-like protein 12 (LOC114293884), transcript variant X3, mRNA	Camellia sinensis	2571	2571	1	0	0.9979	2130	XM_028237987.1
			PREDICTED: Camellia sinensis squamosa promoter-binding-like protein 12 (LOC114293884), transcript variant X2, mRNA	Camellia sinensis	2571	2571	1	0	0.9979	2253	XM_028237986.1
			PREDICTED: Camellia sinensis squamosa promoter-binding-like protein 12 (LOC114293884), transcript variant X1, mRNA	Camellia sinensis	2571	2571	1	0	0.9979	2150	XM_028237985.1
	CsTGY10G0000091	SPL12-2	PREDICTED: Camellia sinensis squamosa promoter-binding-like protein 12 (LOC114312642), transcript variant X5, mRNA	Camellia sinensis	2329	2329	1	0	0.9915	1913	XM_028258907.1
			PREDICTED: Camellia sinensis squamosa promoter-binding-like protein 12 (LOC114312642), transcript variant X6, mRNA	Camellia sinensis	2270	2270	1	0	0.9817	1926	XM_028258909.1
			PREDICTED: Camellia sinensis squamosa promoter-binding-like protein 12 (LOC114312642), transcript variant X4, mRNA	Camellia sinensis	2167	2336	1	0	0.9909	1877	XM_028258906.1
			PREDICTED: Camellia sinensis squamosa promoter-binding-like protein 12 (LOC114312642), transcript variant X3, mRNA	Camellia sinensis	2167	2336	1	0	0.9909	3717	XM_028258905.1
			PREDICTED: Camellia sinensis squamosa promoter-binding-like protein 12 (LOC114312642), transcript variant X2, mRNA	Camellia sinensis	2167	2336	1	0	0.9909	2004	XM_028258904.1
			PREDICTED: Camellia sinensis squamosa promoter-binding-like protein 12 (LOC114312642), transcript variant X1, mRNA	Camellia sinensis	2167	2336	1	0	0.9909	2010	XM_028258903.1
	CsTGY15G0000933	SPL13A	PREDICTED: Camellia sinensis squamosa promoter-binding-like protein 13A (LOC114322180), mRNA	Camellia sinensis	2095	2095	1	0	0.9965	1857	XM_028269443.1
	CsTGY10G0002410	SPL14	PREDICTED: Camellia sinensis squamosa promoter-binding-like protein 14 (LOC114279976), mRNA	Camellia sinensis	2056	2056	1	0	0.9991	1812	XM_028222282.1
	CsTGY10G0000081	SPL16-3	PREDICTED: Camellia sinensis squamosa promoter-binding-like protein 16 (LOC114321899), transcript variant X4, mRNA	Camellia sinensis	1912	1912	1	0	0.9952	1945	XM_028269136.1
			PREDICTED: Camellia sinensis squamosa promoter-binding-like protein 16 (LOC114321899), transcript variant X3, mRNA	Camellia sinensis	1912	1912	1	0	0.9952	1988	XM_028269135.1
			PREDICTED: Camellia sinensis squamosa promoter-binding-like protein 16 (LOC114321899), transcript variant X2, mRNA	Camellia sinensis	1912	1912	1	0	0.9952	2136	XM_028269134.1
			PREDICTED: Camellia sinensis squamosa promoter-binding-like protein 16 (LOC114321899), transcript variant X1, mRNA	Camellia sinensis	1912	1912	1	0	0.9952	2179	XM_028269133.1
	CsTGY02G0000059	SPL16-1	PREDICTED: Camellia sinensis squamosa promoter-binding-like protein 16 (LOC114306365), transcript variant X4, mRNA	Camellia sinensis	2111	2111	1	0	0.9931	2431	XM_028251579.1
			PREDICTED: Camellia sinensis squamosa promoter-binding-like protein 16 (LOC114306365), transcript variant X3, mRNA	Camellia sinensis	2111	2111	1	0	0.9931	2038	XM_028251578.1
			PREDICTED: Camellia sinensis squamosa promoter-binding-like protein 16 (LOC114306365), transcript variant X2, mRNA	Camellia sinensis	2111	2111	1	0	0.9931	2263	XM_028251577.1
			PREDICTED: Camellia sinensis squamosa promoter-binding-like protein 16 (LOC114306365), transcript variant X1, mRNA	Camellia sinensis	2111	2111	1	0	0.9931	2085	XM_028251576.1

## Sheet: Table S4
Table S4. Identified of 47 mature miRNA sequences and 28 precursor sequences
Name	Sequence (5' to 3')
csn-miR156a-2-5p	ACAGAAGATAGAGAGCACAG
csn-miR156a-1-5p	TTGACAGAAGATAGAGAGCAC
csn-miR156a-3-5p	TGACAGAAGATAGAGAGCAC
csn-miR156a-4-3p	GCTCTCTAGTCTTCTGTCATC
csn-miR156b-1-5p	CAGAAGATAGAGAGCACAAC
csn-miR156b-1-5p	GCTCTCTCTTCTTCTGTTAACA
csn-miR156b-2-3p	TGCTCTCTATTCTTTTGTCATC
csn-miR156b-2-5p	TGTTGACAGAAGAAAGAGAGC
csn-miR156b-3-5p	TTGACAGAAGAAAGAGAGCAC
csn-miR156b-4-3p	GCTCTCTGTACTTCTGTCATTA
csn-miR156b-7-3p	TGCTCACTTCTCTTCTGTCAGC
csn-miR156b-7-5p	ACAGAAGAGAGTGAGCACACT
csn-miR156c-3-5p	TGACAGAAGAGAGTGAGCAC
csn-miR156c-3-3p	TGTTCACTTCTCTTCTGTCAGT
csn-miR156d-1-3p	GCTCTTTCTTCTTCTGTCATCA
csn-miR156d-1-5p	TGACAGAAGAGAGAGAGCAC
csn-miR156d-2-5p	TGACAGAAGAGAGAGAGCACA
csn-miR156d-3-5p	TTGACAGAAGAGAGAGAGCAC
csn-miR156d-4-5p	AGAAGAGAGAGAGCACAACCC
csn-miR156e-3p	GCTCACTTCTCTTTCTGTCATT
csn-miR156f-1-3p	TGCTCACTTCTCTTCTGTCATT
csn-miR156f-1-5p	CTGACAGAAGAGAGTGAGCA
csn-miR156f-2-3p	GCTCACTTCTCTTCTGTCATT
csn-miR156f-2-5p	CTGACAGAAGAGAGTGAGCAC
csn-miR156f-3-5p	TGACAGAAGAGAGTGAGCACA
csn-miR156f-4-3p	GCTCACTCTCTATCTGTCATC
csn-miR156f-4-5p	GTGACAGAAGAGAGTGAGCAC
csn-miR156g-1	CTGACAGAAGAGAGTGAGCACT
csn-miR156g-2	CTGACAGAAGAGAGTGAGCACTT
csn-miR156g-3	CTGACAGAAGATAGAGAGCAC
csn-miR156g-4	TTGACAGAAGACAGGGAGCAC
csn-miR156g-5	TGAGAGAGAGAGAGAGAGCAT
csn-miR156g-6	TGACAGAAGAGAGTGAGCACC
csn-miR156h-1	GAGAGAGAGAGAGAGAGCAG
csn-miR156h-2	CAGAAGAAAGAGAGCACGCAT
csn-miR156h-3	CAGAAGATAGAGAGCACATC
csn-miR156h-4	AGACAGAAGAGGGTCGACAC
csn-miR156h-5	CGACAGAAGAGAGTGAGCAC
csn-miR156h-6	CGACAGAAGAGAGTGAGCATA
csn-miR156i-1	TGCTCACTCTTGATCTGTCGCC
csn-miR156i-2	TGTCAGAAGAGAGTGAGCAC
csn-miR156j-1	GCTCTCTAAGCTTCTGTCATC
csn-miR156j-2	GCTCTCTATTCTTCTGTCATC
csn-miR156j-3	GCTCTTTATACTTCTGTCATC
csn-miR156k-1	GCTCACTTCTCTCTCTGTCAGT
csn-miR156k-2	GCTTTCTCTCTCCTTGTCTCC
csn-miR156k-3	GCTCACTTCTCTTTCTGTCAGC
csn-MIR156a-1	TGTTGTTGACAGAAGATAGAGAGCACAGATGATGAAGTGCATGCCTGATTGCATCTCACTCCTTTGTGCTCCCTATCCTTCTGTCATCACCTTC
csn-MIR156a-2	GAGCACAGATGATGGTGTGCATGAAGTATGCATCTCACTCTTTGTGCTCTCTAGTCTTCTGTCATCACCTTCAGCCCCTCACTCCATTTGGATACAATTAGCAGTTGATGAATTGCCAAACATGAAGGTTTCAGTTGTGCTTTAAGCCATTAAAAucucucuuucuuucuuucuuucuuuTATGAAACTTTTCATATTTACTATACACTGAATTGAAGTGAAGAGGAGGCAGTGGGGGATATGTTGTTGACAGAAGATAGAGAGCACAGATGATGAAGTGCATGCCTGATTGCATCTCAC
csn-MIR156a-3	AGGAGGCATTGGTGATGCTGTTGACAGAAGATAGAGAGCACAGATGATGGTGTGCATGAAGTATGCATCTCACTCTTTGTGCTCTCTAGTCTTCTGTCATCACCTTCAGCCCCTCACT
csn-MIR156a-4	TGGTGATGCTGTTGACAGAAGATAGAGAGCACAGATGATGGTGTGCATGAAGTATGCATCTCACTCTTTGTGCTCTCTAGTCTTCTGTCATCACCTTCAGCCCC
csn-MIR156b-1	CAGAAGATAGAGAGCACAACTGAATATGCCCATAAAGGCGTGTGTATGAGCAGTCTTGTGCTCTCTCTTCTTCTGTTAACAAACAAACTTGTTGATGCTATAAGACCATCAAAATCATCTTATGAAGTTTCAACCATATCATTAAGAGGTAAGTATGTATGATACAGTTCTTGATACAAGTTTTGATCTTATTCTTTGCCAGGTTTGAATATCCATATATTGTTATTAACAGTGAAAGGAATGTTTTTGGATCTTTCCTTCAGATTTTCAGAGGAAAAAAGTTGCAGCCGGAAGTATATG
csn-MIR156b-2	TTTAGTATCTACATTGGGGAGAGGAGGCATTGGTGATGATGTTGACAGAAGAAAGAGAGCACAGATGATGGAAAGTGCATGAAGTATGCACTTCTCACTCTTTGTGCTCTCTATTCTTTTGTCATCACCTTCTGCCCCTCGCTTCATTGGATATACTCAT
csn-MIR156b-3	TTGACAGAAGAAAGAGAGCACAGATGATGGAAAGTGCATGAAGTATGCACTTCTCACTCTTTGTGCTCTCTATTCTTTTGTCATCACCTTCTGCCCCTCGCTTCATTGGATATACTCATGCTAACTAGTAATGCTACTGCCCTATTATAACAGAAGAAAAACTACCATACATGGATTGGAGGCCTTTCGGGTGCGTGTTTTTTCTTTCTTATATGATATATTTTTCGTATCTATACTGGGAAGGAGAGGCAATGGTGACGTTGTTGACAGAAGATACAGAGCACAAATGTTGCGTATGTG
csn-MIR156b-4	GAAGATAGAGGTGCTGACATTGTTGACAGAAGATAGAGAGCACAGATGATGAAATGCATTGTATTTACTGTATCTCACTCCTGTGTGCTCTCTGTACTTCTGTCATTACTGCTTCAACCCTTTATCAAC
csn-MiR156b-5	GGATTATTAGACTCATCAAACCCTAATTCTTTATCATCATCATGGGAATCAGTTCTAATGGTAGAGGCTTTGGGTTTTGAGTACTCTCTCTCTTTCCTGAAATGGGTTTTGTCTGTAGTTTCAGATCTAACTCATTGCCATATGATTTATTCACATATGCATACAATTTGCTGTGTGTGTATATGGATGTGTTTCTGGGCTGAGTAAucacucacucacucaucagucaTGACTGATCAGAGGGAGTGTCTGACAGAAGAGAGTGAGCACACTACAAACAATTGTATAAAAGATTATACC
csn-MIR156b-6	GATTATTAGACTCATCAAACCCTAATTCTTTATCATCATCATGGGAATCAGTTCTAATGGTAGAGGCTTTGGGTTTTGAGTACTCTCTCTCTTTCCTGAAATGGGTTTTGTCTGTAGTTTCAGATCTAACTCATTGCCATATGATTTATTCACATATGCATACAATTTGCTGTGTGTGTATATGGATGTGTTTCTGGGCTGAGTAAucacucacucacucaucagucaTGACTGATCAGAGGGAGTGTCTGACAGAAGAGAGTGAGCACACTACAAACAATTGTATAAAAGATTATACCA
csn-MIR156b-7	TGTCTGACAGAAGAGAGTGAGCACACTACAAACAATTGTATAAAAGATTATACCATTGTGTGGTGTGTGTGCTCACTTCTCTTCTGTCAGCTT
csn-MIR156c-1	CGATTCCTCTCTCTTTCTTTTGCCATCAAATCTACGGGGAAGACCTGTTTGTTCAAATAAGAACATATGTAATATTACTGTTCACAAATGAATAGTGATAATAAGTGTAAATA
csn-MIR156c-2	TTTTACTTGAAACGGTATGAGTTGATGTGTGGTCTAATGGAAAGGGCTGTGGATCTCTTTCCAATAATGGGTCTGTCTTTGGTTTCAGATCTGACTCTTCAGTACTTAAGAGAAATATATTATATATATATGTATTTTTTTTTTCATATTTGGTGAAGAAGATTGATAGTGTTATGATTTTTTTTTTTCGTGGGTGCTGATGAGTCATGTAAGTAATGAGAAAGAGATGACAGAAGAGAGAGATTTGACTGACAGAAGAGAGTGAGCACACTACAGGCAATTGTATAAAAGTGTATATAA
csn-MIR156c-3	TTTGACTGACAGAAGAGAGTGAGCACACTACAGGCAATTGTATAAAAGTGTATATAATTGTGGGATACGTGTGTTCACTTCTCTTCTGTCAGTTTTA
csn-MIR156d-1	AATGTTGACAGAAGAGAGAGAGCACAACCCGCCATCAGCTAAAGAAAATCTTTACGTGTTGTGGGAGTGTGCTCTTTCTTCTTCTGTCATCATC
csn-MIR156d-2	ATGTTGACAGAAGAGAGAGAGCACAACCCGCCATCAGCTAAAGAAAATCTTTACGTGTTGTGGGAGTGTGCTCTTTCTTCTTCTGTCATCAT
csn-MIR156d-3	TTGACAGAAGAGAGAGAGCACAACCCGCCATCAGCTAAAGAAAATCTTTACGTGTTGTGGGAGTGTGCTCTTTCTTCTTCTGTCATCATCTTTGAAACTGTCTCAACATTTGATCACCACCGTCAGATCCTGATCAAACAGCCCTTTGATTGTGGGATTGATGTAAGATCTCTAATCTAATCCCTCCAAATTAAGTTGTTATACTTGTTTATGATTTATTATAATGTGCATGAAAGATGATAAAACCAGTTTATTTAGTCATCCACTAGAATCTCTTTTTAATAAATTGGAAAAAAAAGA
csn-MIR156d-4	GATCGGGTTTGCCTTTGGTACGCGATTCCTCTCTCTTTCTTTTGCCATCAAATCTACCGGGAAGACCTGTTT
csn-MIR156e	TTTTTCTGGATCACCAAGAAATGACAGAAGAGAGTGAGCACATATGGTGGAAATTGGTATGTTCATATCATTACTCTTATGTGCTCACTTCTCTTTCTGTCATTTTCCAGTGCCAGAACTT
csn-MIR156f-1	TTTTCTCGTTCTGGGTCTCTGCTTGAAAAAACTGACAGAAGAGAGTGAGCACACAGAGGCTAATTGGTATAAGTCTATGCCATTGCTTTTGCGTGCTCACTTCTCTTCTGTCATTTTGCTCTCTCCCGGAATTTGTTTCTCTCTCTCTCACTCTCTATATCTATTTGTTTTTCTGGTTTGTGGGTTGGGTGTGTGTGTATGTAGTAGTTGAACACATGAGAAGGTAGTGGGAAAAGAATGGTTACAAGATGATGGTGGTTTTGAGTGTCTATTTGCTTTGGTTTTTAGTGGGTTCGAATT
csn-MIR156f-2	CTCGTTCTGGGTCTCTGCTTGAAAAAACTGACAGAAGAGAGTGAGCACACAGAGGCTAATTGGTATAAGTCTATGCCATTGCTTTTGCGTGCTCACTTCTCTTCTGTCATTTTGCTCTCTCCCGGAATTTG
csn-MIR156f-3	AAACTGACAGAAGAGAGTGAGCACACAGAGGCTAATTGGTATAAGTCTATGCCATTGCTTTTGCGTGCTCACTTCTCTTCTGTCA
csn-MIR156f-4	TTTGAAGGGTAAGAGAGGTGACAGAAGAGAGTGAGCACACATGGTCTTTTCTTGCATGACTTCTCCATGCTCGAAGCTATGCGTGCTCACTCTCTATCTGTCATCCACCAACCATTCTCTCTTCCTCTCTCT
csn-MIR156f-5	GTAAGAGAGGTGACAGAAGAGAGTGAGCACACATGGTCTTTTCTTGCATGACTTCTCCATGCTCGAAGCTATGCGTGCTCACTCTCTATCTGTCATCCAC
csn-MIR156f-6	AGGTGACAGAAGAGAGTGAGCACACATGGTCTTTTCTTGCATGACTTCTCCATGCTCGAAGCTATGCGTGCTCACTCTCTATCTGTCATCC
csn-MIR156f-7	GTAAGAGAGGTGACAGAAGAGAGTGAGCACACATGGTCTTTTCTTGCATGACTTCTCCATGCTCGAAGCTATGCGTGCTCACTCTCTATCTGTCATCC
csn-MIR156g-1	ATGTTGTTGACAGAAGATAGAGAGCACAGATGATAAAATGCACAGAGAGTTTGCATCTCACTCCTTTGTGCTCTCTATACTTCTGTCATCATCCTTT
csn-MIR156g-2	TGTTGTTGACAGAAGATAGAGAGCACAGATGATGAAATGCACAGAGAGTTTGCATCTCACTCCTTTGTGCTTTCTATACTTCTGTCATCATCC

## Sheet: Table S5
TableS5. The gene primers presented in this paper.
Purpose	Primer name	Seguence (5' to 3')
Real Time PCR	csn-miR156a-1-5p	TTGACAGAAGATAGAGAGCAC
	csn-miR156a-4-3p	GCTCTCTAGTCTTCTGTCATC
	csn-miR156b-3-5p	TTGACAGAAGAAAGAGAGCAC
	csn-miR156b-7-5p	ACAGAAGAGAGTGAGCACACT
	csn-miR156d-2-5p	TGACAGAAGAGAGAGAGCACA
	csn-miR156f-4-3p	GCTCACTCTCTATCTGTCATC
	csn-miR156f-2-5p	CTGACAGAAGAGAGTGAGCAC
	csn-miR156f-4-5p	GTGACAGAAGAGAGTGAGCAC
	csn-miR156f-3-5p	TGACAGAAGAGAGTGAGCACA
	miR222	TTTCCAAGACCACCCATGCCGA
	CsSPL6-2-F (CsTGY15G0001546)	CCGTCATATATTGGTTCTGCAGG
	CsSPL6-2-R (CsTGY15G0001546)	AGGACAATAATCGGCTCCATCT
	CsSPL12-1-F (CsTGY06G0000121)	CTGACTGGGGAATTGAAGAGG
	CsSPL12-1-R (CsTGY06G0000121)	AGAACCAGAACCACCACCTC
	CsSPL12-2-F (CsTGY10G0000091)	AGACTGGGAAATTGGGGAGG
	CsSPL12-2-R (CsTGY10G0000091)	ACCATGTGCCAAATCAGAGC
	CsSPL14-F (CsTGY10G0002410)	ACTGATGGAACTCACGTGGT
	CsSPL14-R (CsTGY10G0002410)	GGAAGAGTCATACGCCCCTG
	CsSPL16-1-F (CsTGY02G0000059)	CCCATTCTTGCTTGCAAACG
	CsSPL16-1-R (CsTGY02G0000059)	TTGAGAAGTCGCTGGCAGAT
	CsSPL16-2-F (CsTGY02G0001323)	TCTCCTCCATCGGCAATTC
	CsSPL16-2-R (CsTGY02G0001323)	TGTGGATCAAAGAACCCGAG
	CsSPL16-3-F (CsTGY10G0000081)	AGTCCCATGATGAACTCTGCT
	CsSPL16-3-R (CsTGY10G0000081)	GGTTTCCTCCTCCAAAGCTG
	GAPDH-F	TTGGCATCGTTGAGGGTCT
	GAPDH-R	CAGTGGGAACACGGAAAGC
Gene specific reverse primers used for PCR	5' RACE Adapter	GCUGAUGGCGAUGAAUGAACACUGCGUUUGCUGGCUUUGAUGAAA
	RACE outer primer	GCTGATGGCGATGAATGAACACTG
	RACE inner primer	CGCGGATCCGAACACTGCGTTTGCTGGCTTTGATG
	SPL14-outer (CsTGY10G0002410)	TGAAGGTTTATCCCAACAACACAC
	SPL14-inner (CsTGY10G0002410)	GGCTGACCCTGGTTTATTAACTGC
Primer sequences used for AsODN	AsODN-miR156-1	ACCCACAAACCAGAAAAACA
	AsODN-miR156-2	AACCCACTAAAAACCAAAGC
	AsODN-miR156-3	GTTTTTTCAAGCAGAGACCC
	sODN-miR156-1	TGTTTTTCTGGTTTGTGGGT
	sODN-miR156-2	GCTTTGGTTTTTAGTGGGTT
	sODN-miR156-3	GGGTCTCTGCTTGAAAAAAC
